# Supplementary material for: Brain Structural Correlates of EEG Network Hyperexcitability, Symptom Severity, Attention, and Memory in Borderline Personality Disorder
Source: MDPI journal article supplement (doi:10.3390/brainsci15060592), 2025-05-31
Supplement: s1 [file brainsci-3608228-supplementary.pdf › brainsci-3608228-supplementary.pdf]

## Supplementary materials

| Questionnaire                                             | Reference                            |
|-----------------------------------------------------------|--------------------------------------|
| Structured Clinical Interview for DSM-IV (SCID-I/SCID-II) | First et al., 1997 [1]               |
| Borderline-Symptom List (BSL)                             | Bohus et al., 2001 [2]               |
| Dissociation Experience Scale (FDS-20)                    | Freyberger et al., 1998 [3]          |
| Symptom-Checklist (SCL-90-R)                              | Derogatis et al., 1976 [4]           |
| Beck Depression Inventory II (BDI-II)                     | Hautzinger et al., 2006 [5]          |
| State-Trait-Anxiety-Inventory (STAI-G)                    | Laux et al., 1981 [6]                |
| Wender Utah Rating Scale (WURS)                           | Retz-Junginger et al. 2002 [7]       |
| ADHD-Checklist for DSM-IV (ADHD-CL)                       | Rösler et al. 2004 [8]               |
| Autism Spectrum Quotient (AQ)                             | Baron-Cohen et al., 2001 [9]         |
| Cambridge Behaviour Scale-40 (Empathy Quotient)           | Baron-Cohen & Wheelwright, 2004 [10] |
| Inventory Of Personality Organization (IPO-16)            | Clarkin et al., 2001 [11]            |
| Difficulties in Emotion Regulation Scale (DERS)           | Gratz & Roemer, 2004 [12]            |
| Neuropsychological Test                                   | Reference                            |
| Test for Attentional Performances (TAP)                   | Zimmermann & Fimm, 1993 [13]         |
| Verbal Learning and Memory Test (VLMT)                    | Helmstaedter et al., 1990 [14]       |
| Culture Fair Intelligence Test (CFT-20 R)                 | Weiß, 2019 [15]                      |
| Multiple-choice word test (MWT-B)                         | Lehrl et al., 1995 [16]              |

**Supplementary Table S1: Psychometry and neuropsychological test battery for the borderline personality disorder patient and healthy control group.** Abbreviations: ADHD-CL, ADHD-Checklist for DSM-IV; AQ, Autism Spectrum Quotient; BDI-II, Beck Depression Inventory II; BSL, Borderline-Symptom List; CFT-20 R, Culture Fair Intelligence Test; DERS, Difficulties in Emotion Regulation Scale; EQ, Cambridge Behaviour Scale-40; FDS-20, Dissociation Experience Scale; IPO-16, Inventory of Personality Organization; MWT-B, Multiple-choice Word Test; SCL-90-R, Symptom-Checklist; SCID-I/SCID-II, Structured Clinical Interview for DSM-IV; STAI-G, State-Trait Anxiety Inventory; TAP, Test for Attentional Performances; VLMT, Verbal Learning and Memory Test; WURS, Wender Utah Rating Scale.

## References

1. First, M.B.; Spitzer, R.L.; Gibbon, M.; Williams, J.B.W. *Structured Clinical Interview for DSM-IV Axis I Disorders (SCID-I) and Axis II Disorders (SCID-II)*; American Psychiatric Press: Washington, DC, USA, 1997;
2. Bohus, M.; Limberger, M.F.; Sender, I.; Gratwohl, T.; Stieglitz, R.-D. Entwicklung Der Borderline-Symptom-Liste (Development of Borderline Symptom List). *Psychother. Psychosom. Med. Psychol.* **2001**, *51*, 201–211, doi:10.1055/s-2001-13281.
3. Freyberger, H.J.; Spitzer, C.; Stieglitz, R.-D.; Kuhn, G.; Magdeburg, N.; Bernstein-Carlson, E. Fragebogen Zu Dissoziativen Symptomen (FDS). Deutsche Adaptation, Reliabilität Und Validität Der Amerikanischen Dissociative Experience Scale (DES). [The Fragebogen (Questionnaire) Zu Dissoziativen Symptomen (FDS): German Adaptation, Reliability, and Validity of the American Dissociative Experience Scale (DES).]. *PPmP Psychother. Psychosom. Med. Psychol.* **1998**, *48*, 223–229.
4. Derogatis, L.R. *The Symptom Checklist-90-R (SCL-90-R): Administration, Scoring, and Procedures Manual*; Clinical Psychometric Research: Baltimore, MD, USA, 1976;
5. Hautzinger, M.; Keller, F.; Kühner, C. *Beck Depressions-Inventar Revision (BDI-II)*; Harcourt Test Services: Frankfurt am Main, Germany, 2006;
6. Laux, L.; Glanzmann, P.; Schaffner, P.; Spielberger, C.D. *Das State-Trait-Angstinventar (STAI): Theoretische Grundlagen Und Handanweisung*; Beltz: Weinheim, Germany, 1981;
7. Retz-Junginger, P.; Retz, W.; Blocher, D.; Weijers, H.-G.; Trott, G.-E.; Wender, P.H.; Rössler, M. Wender Utah Rating Scale (WURS-k) Die deutsche Kurzform zur retrospektiven Erfassung des hyperkinetischen Syndroms bei Erwachsenen. *Nervenarzt* **2002**, *73*, 830–838, doi:10.1007/s00115-001-1215-x.
8. Rösler, M.; Retz, W.; Retz-Junginger, P.; Thome, J.; Supprian, T.; Nissen, T.; Stieglitz, R.-D.; Blocher, D.; Hengesbach, G.; Trott, G.E. Instrumente zur Diagnostik der Aufmerksamkeitsdefizit-/Hyperaktivitätsstörung (ADHS) im Erwachsenenalter. *Nervenarzt* **2004**, *75*, 888–895, doi:10.1007/s00115-003-1622-2.
9. Baron-Cohen, S.; Wheelwright, S.; Skinner, R.; Martin, J.; Clubley, E. The Autism-Spectrum Quotient (AQ): Evidence from Asperger Syndrome/High-Functioning Autism, Males and Females, Scientists and Mathematicians. *J. Autism Dev. Disord.* **2001**, *31*, 5–17, doi:10.1023/a:1005653411471.
10. Baron-Cohen, S.; Wheelwright, S. The Empathy Quotient: An Investigation of Adults with Asperger Syndrome or High Functioning Autism, and Normal Sex Differences. *J. Autism Dev. Disord.* **2004**, *34*, 163–175, doi:10.1023/b:jadd.0000022607.19833.00.
11. Clarkin, J.F.; Foelsch, P.A.; Kernberg, O.F.; Ingenhoven, T. THE INVENTORY OF PERSONALITY ORGANISATION. **2001**.
12. Gratz, K.L.; Roemer, L. Multidimensional Assessment of Emotion Regulation and Dysregulation: Development, Factor Structure, and Initial Validation of the Difficulties in Emotion Regulation Scale. *J. Psychopathol. Behav. Assess.* **2004**, *26*, 41–54, doi:10.1023/B:JOBA.0000007455.08539.94.
13. Zimmermann, P.; Fimm, B. *Testbatterie Zur Aufmerksamkeitsprüfung (TAP)*; Psytest: Herzogenrath, Germany, 1993;
14. Helmstaedter, C.; Durwen, H.F. VLMT: Verbaler Lern- Und Merkfähigkeitstest: Ein Praktikables Und Differenziertes Instrumentarium Zur Prüfung Der Verbalen Gedächtnisleistungen. [VLMT: A Useful Tool to Assess and Differentiate Verbal Memory Performance.]. *Schweiz. Arch. Für Neurol. Neurochir. Psychiatr.* **1990**, *141*, 21–30.
15. Weiß, R. CFT 20-R Testheft, 2. Auflage Kaufen | Hogrefe-Verlag | SpielundLern Available online: [https://www.spielundlern.de/product\\_info.php/products\\_id/195230](https://www.spielundlern.de/product_info.php/products_id/195230) (accessed on 29 May 2024).

16. Lehrl, S.; Triebig, G.; Fischer, B. Multiple Choice Vocabulary Test MWT as a Valid and Short Test to Estimate Premorbid Intelligence. *Acta Neurol. Scand.* **1995**, *91*, 335–345, doi:10.1111/j.1600-0404.1995.tb07018.x.

| Sociodemographic characteristic | BPD, N = 70 <sup>1</sup> | HC, N = 36 <sup>1</sup> | p-value <sup>2</sup> |
|---------------------------------|--------------------------|-------------------------|----------------------|
| Age                             | 30.14 ± 9.5 (N = 70)     | 27.08 ± 7.4 (N = 36)    | 0.071                |
| Education level                 |                          |                         | <0.001               |
| University degree               | 9 (13%; N = 67)          | 18 (51%; N = 35)        |                      |
| High degree                     | 25 (37%; N = 67)         | 15 (43%; N = 35)        |                      |
| Middle degree                   | 27 (40%; N = 67)         | 2 (5.7%; N = 35)        |                      |
| Low degree                      | 5 (7.5%; N = 67)         | 0 (0%; N = 35)          |                      |
| Other qualification             | 1 (1.5%; N = 67)         | 0 (0%; N = 35)          |                      |
| Employment status               |                          |                         | <0.001               |
| Unemployed                      | 24 (36%; N = 67)         | 0 (0%; N = 35)          |                      |
| Retired                         | 6 (9.0%; N = 67)         | 0 (0%; N = 35)          |                      |
| Apprentice                      | 2 (3.0%; N = 67)         | 2 (5.7%; N = 35)        |                      |
| Student                         | 10 (15%; N = 67)         | 20 (57%; N = 35)        |                      |
| Part-time job                   | 21 (31%; N = 67)         | 7 (20%; N = 35)         |                      |
| Full-time job                   | 4 (6.0%; N = 67)         | 6 (17%; N = 35)         |                      |
| Marital status                  |                          |                         | 0.435                |
| Single/ unwed                   | 57 (85%; N = 67)         | 33 (94%; N = 35)        |                      |
| Married                         | 5 (7.5%; N = 67)         | 1 (2.9%; N = 35)        |                      |
| Divorced                        | 5 (7.5%; N = 67)         | 1 (2.9%; N = 35)        |                      |
| Handedness                      |                          |                         | 0.106                |
| Both                            | 4 (6.0%; N = 67)         | 0 (0%; N = 35)          |                      |
| Left                            | 5 (7.5%; N = 67)         | 0 (0%; N = 35)          |                      |
| Right                           | 58 (87%; N = 67)         | 35 (100%; N = 35)       |                      |
| BMI                             | 27.0 ± 7.3 (N = 70)      | 21.4 ± 1.9 (N = 36)     | <0.001               |
| Tobacco                         | 27 (40%; N = 68)         | 7 (19%; N = 36)         | 0.048                |
| Package years                   | 2.88 ± 6.3 (N = 65)      | 0.31 ± 0.9 (N = 36)     | 0.002                |

**Supplementary Table S2.** Sociodemographic characteristics of the borderline personality disorder and healthy control group. <sup>1</sup>Mean ± SD; n (%; N = N Non-missing. <sup>2</sup>Welch Two Sample t-test; Fisher's exact test. Abbreviations: BMI, body mass-index; BPD, borderline personality disorder; HC, healthy controls; N, sample size; p-value, probability value; SD, standard deviation.

| EEG (IRDA/IRTA)             | Brain Region                               | r      | p-value | adjusted p-value |
|-----------------------------|--------------------------------------------|--------|---------|------------------|
| IRDA/IRTA per min before HV | left banks of the superior temporal sulcus | 0.089  | 0.464   | 0.585            |
| IRDA/IRTA per min before HV | left caudal anterior cingulate             | -0.037 | 0.761   | 0.822            |
| IRDA/IRTA per min before HV | left caudal middle frontal                 | 0.229  | 0.057   | 0.185            |
| IRDA/IRTA per min before HV | left cuneus                                | 0.186  | 0.123   | 0.245            |
| IRDA/IRTA per min before HV | left entorhinal                            | 0.017  | 0.890   | 0.931            |
| IRDA/IRTA per min before HV | left frontal pole                          | 0.139  | 0.251   | 0.388            |
| IRDA/IRTA per min before HV | left fusiform                              | 0.227  | 0.059   | 0.185            |
| IRDA/IRTA per min before HV | left inferior parietal                     | 0.303  | 0.011   | 0.185            |
| IRDA/IRTA per min before HV | left inferior temporal                     | 0.156  | 0.197   | 0.319            |
| IRDA/IRTA per min before HV | left insula                                | 0.143  | 0.238   | 0.377            |
| IRDA/IRTA per min before HV | left isthmus cingulate                     | 0.052  | 0.668   | 0.769            |
| IRDA/IRTA per min before HV | left lateral occipital                     | 0.044  | 0.716   | 0.798            |
| IRDA/IRTA per min before HV | left lateral orbitofrontal                 | 0.241  | 0.045   | 0.185            |
| IRDA/IRTA per min before HV | left lingual                               | 0.226  | 0.060   | 0.185            |
| IRDA/IRTA per min before HV | left medial orbitofrontal                  | 0.096  | 0.429   | 0.550            |
| IRDA/IRTA per min before HV | left middle temporal                       | 0.121  | 0.318   | 0.451            |
| IRDA/IRTA per min before HV | left paracentral                           | 0.219  | 0.069   | 0.193            |
| IRDA/IRTA per min before HV | left parahippocampal                       | -0.008 | 0.946   | 0.955            |
| IRDA/IRTA per min before HV | left pars opercularis                      | 0.050  | 0.679   | 0.769            |
| IRDA/IRTA per min before HV | left pars orbitalis                        | 0.107  | 0.379   | 0.514            |
| IRDA/IRTA per min before HV | left pars triangularis                     | 0.183  | 0.130   | 0.245            |
| IRDA/IRTA per min before HV | left pericalcarine                         | 0.323  | 0.006   | 0.185            |
| IRDA/IRTA per min before HV | left postcentral                           | 0.293  | 0.014   | 0.185            |
| IRDA/IRTA per min before HV | left posterior cingulate                   | 0.184  | 0.128   | 0.245            |
| IRDA/IRTA per min before HV | left precentral                            | 0.263  | 0.028   | 0.185            |
| IRDA/IRTA per min before HV | left precuneus                             | 0.279  | 0.019   | 0.185            |
| IRDA/IRTA per min before HV | left rostral anterior cingulate            | 0.179  | 0.139   | 0.245            |
| IRDA/IRTA per min before HV | left rostral middle frontal                | 0.194  | 0.108   | 0.244            |
| IRDA/IRTA per min before HV | left superior frontal                      | 0.179  | 0.139   | 0.245            |
| IRDA/IRTA per min before HV | left superior parietal                     | 0.243  | 0.043   | 0.185            |
| IRDA/IRTA per min before HV | left superior temporal                     | 0.176  | 0.145   | 0.247            |
| IRDA/IRTA per min before HV | left supramarginal                         | 0.190  | 0.114   | 0.245            |
| IRDA/IRTA per min before HV | left temporal pole                         | 0.008  | 0.945   | 0.955            |

|                             |                                             |        |       |       |
|-----------------------------|---------------------------------------------|--------|-------|-------|
| IRDA/IRTA per min before HV | left transverse temporal                    | 0.236  | 0.050 | 0.185 |
| IRDA/IRTA per min before HV | right banks of the superior temporal sulcus | 0.072  | 0.556 | 0.687 |
| IRDA/IRTA per min before HV | right caudal anterior cingulate             | 0.105  | 0.389 | 0.514 |
| IRDA/IRTA per min before HV | right caudal middle frontal                 | 0.137  | 0.257 | 0.388 |
| IRDA/IRTA per min before HV | right cuneus                                | 0.158  | 0.191 | 0.317 |
| IRDA/IRTA per min before HV | right entorhinal                            | 0.007  | 0.955 | 0.955 |
| IRDA/IRTA per min before HV | right frontal pole                          | 0.104  | 0.393 | 0.514 |
| IRDA/IRTA per min before HV | right fusiform                              | 0.323  | 0.006 | 0.185 |
| IRDA/IRTA per min before HV | right inferior parietal                     | 0.228  | 0.058 | 0.185 |
| IRDA/IRTA per min before HV | right inferior temporal                     | 0.274  | 0.022 | 0.185 |
| IRDA/IRTA per min before HV | right insula                                | 0.056  | 0.643 | 0.754 |
| IRDA/IRTA per min before HV | right isthmus cingulate                     | 0.214  | 0.076 | 0.196 |
| IRDA/IRTA per min before HV | right lateral occipital                     | 0.256  | 0.032 | 0.185 |
| IRDA/IRTA per min before HV | right lateral orbitofrontal                 | 0.272  | 0.023 | 0.185 |
| IRDA/IRTA per min before HV | right lingual                               | 0.217  | 0.071 | 0.193 |
| IRDA/IRTA per min before HV | right medial orbitofrontal                  | -0.019 | 0.876 | 0.931 |
| IRDA/IRTA per min before HV | right middle temporal                       | 0.239  | 0.046 | 0.185 |
| IRDA/IRTA per min before HV | right paracentral                           | 0.189  | 0.116 | 0.245 |
| IRDA/IRTA per min before HV | right parahippocampal                       | -0.061 | 0.614 | 0.745 |
| IRDA/IRTA per min before HV | right pars opercularis                      | 0.267  | 0.025 | 0.185 |
| IRDA/IRTA per min before HV | right pars orbitalis                        | 0.203  | 0.092 | 0.224 |
| IRDA/IRTA per min before HV | right pars triangularis                     | 0.187  | 0.121 | 0.245 |
| IRDA/IRTA per min before HV | right pericalcarine                         | 0.224  | 0.063 | 0.185 |
| IRDA/IRTA per min before HV | right postcentral                           | 0.225  | 0.061 | 0.185 |
| IRDA/IRTA per min before HV | right posterior cingulate                   | 0.115  | 0.344 | 0.478 |
| IRDA/IRTA per min before HV | right precentral                            | 0.247  | 0.039 | 0.185 |
| IRDA/IRTA per min before HV | right precuneus                             | 0.257  | 0.032 | 0.185 |
| IRDA/IRTA per min before HV | right rostral anterior cingulate            | 0.060  | 0.624 | 0.745 |
| IRDA/IRTA per min before HV | right rostral middle frontal                | 0.178  | 0.140 | 0.245 |
| IRDA/IRTA per min before HV | right superior frontal                      | 0.123  | 0.311 | 0.451 |
| IRDA/IRTA per min before HV | right superior parietal                     | 0.212  | 0.078 | 0.196 |
| IRDA/IRTA per min before HV | right superior temporal                     | 0.195  | 0.105 | 0.244 |
| IRDA/IRTA per min before HV | right supramarginal                         | 0.228  | 0.058 | 0.185 |
| IRDA/IRTA per min before HV | right temporal pole                         | 0.037  | 0.759 | 0.822 |
| IRDA/IRTA per min before HV | right transverse temporal                   | 0.130  | 0.283 | 0.418 |

|                                       |                                             |        |       |       |
|---------------------------------------|---------------------------------------------|--------|-------|-------|
| IRDA/IRTA per min before vs. after HV | left banks of the superior temporal sulcus  | -0.033 | 0.792 | 0.880 |
| IRDA/IRTA per min before vs. after HV | left caudal anterior cingulate              | 0.071  | 0.568 | 0.721 |
| IRDA/IRTA per min before vs. after HV | left caudal middle frontal                  | -0.251 | 0.041 | 0.296 |
| IRDA/IRTA per min before vs. after HV | left cuneus                                 | -0.122 | 0.325 | 0.491 |
| IRDA/IRTA per min before vs. after HV | left entorhinal                             | 0.191  | 0.122 | 0.320 |
| IRDA/IRTA per min before vs. after HV | left frontal pole                           | -0.044 | 0.721 | 0.859 |
| IRDA/IRTA per min before vs. after HV | left fusiform                               | -0.124 | 0.316 | 0.491 |
| IRDA/IRTA per min before vs. after HV | left inferior parietal                      | -0.228 | 0.063 | 0.307 |
| IRDA/IRTA per min before vs. after HV | left inferior temporal                      | -0.200 | 0.105 | 0.317 |
| IRDA/IRTA per min before vs. after HV | left insula                                 | -0.011 | 0.928 | 0.962 |
| IRDA/IRTA per min before vs. after HV | left isthmus cingulate                      | -0.268 | 0.028 | 0.274 |
| IRDA/IRTA per min before vs. after HV | left lateral occipital                      | -0.118 | 0.340 | 0.502 |
| IRDA/IRTA per min before vs. after HV | left lateral orbitofrontal                  | -0.136 | 0.271 | 0.460 |
| IRDA/IRTA per min before vs. after HV | left lingual                                | -0.128 | 0.301 | 0.487 |
| IRDA/IRTA per min before vs. after HV | left medial orbitofrontal                   | -0.201 | 0.102 | 0.317 |
| IRDA/IRTA per min before vs. after HV | left middle temporal                        | -0.164 | 0.184 | 0.356 |
| IRDA/IRTA per min before vs. after HV | left paracentral                            | -0.106 | 0.395 | 0.572 |
| IRDA/IRTA per min before vs. after HV | left parahippocampal                        | 0.167  | 0.176 | 0.353 |
| IRDA/IRTA per min before vs. after HV | left pars opercularis                       | -0.229 | 0.063 | 0.307 |
| IRDA/IRTA per min before vs. after HV | left pars orbitalis                         | -0.185 | 0.134 | 0.328 |
| IRDA/IRTA per min before vs. after HV | left pars triangularis                      | -0.259 | 0.034 | 0.292 |
| IRDA/IRTA per min before vs. after HV | left pericalcarine                          | -0.027 | 0.827 | 0.892 |
| IRDA/IRTA per min before vs. after HV | left postcentral                            | -0.197 | 0.110 | 0.317 |
| IRDA/IRTA per min before vs. after HV | left posterior cingulate                    | -0.061 | 0.624 | 0.772 |
| IRDA/IRTA per min before vs. after HV | left precentral                             | -0.195 | 0.113 | 0.317 |
| IRDA/IRTA per min before vs. after HV | left precuneus                              | -0.167 | 0.176 | 0.353 |
| IRDA/IRTA per min before vs. after HV | left rostral anterior cingulate             | -0.247 | 0.044 | 0.296 |
| IRDA/IRTA per min before vs. after HV | left rostral middle frontal                 | -0.303 | 0.013 | 0.274 |
| IRDA/IRTA per min before vs. after HV | left superior frontal                       | -0.218 | 0.076 | 0.317 |
| IRDA/IRTA per min before vs. after HV | left superior parietal                      | -0.168 | 0.173 | 0.353 |
| IRDA/IRTA per min before vs. after HV | left superior temporal                      | -0.001 | 0.996 | 0.996 |
| IRDA/IRTA per min before vs. after HV | left supramarginal                          | -0.176 | 0.155 | 0.353 |
| IRDA/IRTA per min before vs. after HV | left temporal pole                          | -0.031 | 0.802 | 0.880 |
| IRDA/IRTA per min before vs. after HV | left transverse temporal                    | 0.005  | 0.965 | 0.980 |
| IRDA/IRTA per min before vs. after HV | right banks of the superior temporal sulcus | -0.194 | 0.116 | 0.317 |

|                                       |                                  |        |        |       |
|---------------------------------------|----------------------------------|--------|--------|-------|
| IRDA/IRTA per min before vs. after HV | right caudal anterior cingulate  | -0.077 | 0.537  | 0.703 |
| IRDA/IRTA per min before vs. after HV | right caudal middle frontal      | -0.200 | 0.105  | 0.317 |
| IRDA/IRTA per min before vs. after HV | right cuneus                     | -0.042 | 0.733  | 0.859 |
| IRDA/IRTA per min before vs. after HV | right entorhinal                 | 0.049  | 0.692  | 0.840 |
| IRDA/IRTA per min before vs. after HV | right frontal pole               | -0.070 | 0.573  | 0.721 |
| IRDA/IRTA per min before vs. after HV | right fusiform                   | -0.163 | 0.189  | 0.356 |
| IRDA/IRTA per min before vs. after HV | right inferior parietal          | -0.212 | 0.085  | 0.317 |
| IRDA/IRTA per min before vs. after HV | right inferior temporal          | -0.234 | 0.057  | 0.307 |
| IRDA/IRTA per min before vs. after HV | right insula                     | -0.122 | 0.324  | 0.491 |
| IRDA/IRTA per min before vs. after HV | right isthmus cingulate          | -0.419 | <0.001 | 0.028 |
| IRDA/IRTA per min before vs. after HV | right lateral occipital          | -0.202 | 0.101  | 0.317 |
| IRDA/IRTA per min before vs. after HV | right lateral orbitofrontal      | -0.275 | 0.024  | 0.274 |
| IRDA/IRTA per min before vs. after HV | right lingual                    | -0.236 | 0.054  | 0.307 |
| IRDA/IRTA per min before vs. after HV | right medial orbitofrontal       | -0.206 | 0.095  | 0.317 |
| IRDA/IRTA per min before vs. after HV | right middle temporal            | -0.286 | 0.019  | 0.274 |
| IRDA/IRTA per min before vs. after HV | right paracentral                | -0.077 | 0.537  | 0.703 |
| IRDA/IRTA per min before vs. after HV | right parahippocampal            | 0.038  | 0.759  | 0.864 |
| IRDA/IRTA per min before vs. after HV | right pars opercularis           | -0.225 | 0.068  | 0.307 |
| IRDA/IRTA per min before vs. after HV | right pars orbitalis             | -0.184 | 0.135  | 0.328 |
| IRDA/IRTA per min before vs. after HV | right pars triangularis          | -0.286 | 0.019  | 0.274 |
| IRDA/IRTA per min before vs. after HV | right pericalcarine              | -0.038 | 0.763  | 0.864 |
| IRDA/IRTA per min before vs. after HV | right postcentral                | -0.149 | 0.228  | 0.397 |
| IRDA/IRTA per min before vs. after HV | right posterior cingulate        | -0.014 | 0.913  | 0.962 |
| IRDA/IRTA per min before vs. after HV | right precentral                 | -0.132 | 0.288  | 0.478 |
| IRDA/IRTA per min before vs. after HV | right precuneus                  | -0.151 | 0.221  | 0.396 |
| IRDA/IRTA per min before vs. after HV | right rostral anterior cingulate | -0.100 | 0.422  | 0.598 |
| IRDA/IRTA per min before vs. after HV | right rostral middle frontal     | -0.275 | 0.024  | 0.274 |
| IRDA/IRTA per min before vs. after HV | right superior frontal           | -0.169 | 0.171  | 0.353 |
| IRDA/IRTA per min before vs. after HV | right superior parietal          | -0.097 | 0.437  | 0.606 |
| IRDA/IRTA per min before vs. after HV | right superior temporal          | -0.010 | 0.934  | 0.962 |
| IRDA/IRTA per min before vs. after HV | right supramarginal              | -0.155 | 0.211  | 0.388 |
| IRDA/IRTA per min before vs. after HV | right temporal pole              | -0.077 | 0.537  | 0.703 |
| IRDA/IRTA per min before vs. after HV | right transverse temporal        | -0.173 | 0.162  | 0.353 |



**Supplementary Table S3.** Correlations of electroencephalography findings and cortical thickness of patients with borderline personality disorder. Abbreviations: *HV*, *hyperventilation*; *IRDA/IRTA*, *intermittent rhythmic delta/theta activity*.

| <b>EEG (IRDA/IRTA)</b>                | <b>Brain Region</b>     | <b>r</b> | <b>p-value</b> | <b>adjusted p-value</b> |
|---------------------------------------|-------------------------|----------|----------------|-------------------------|
| IRDA/IRTA per min before HV           | Left Lateral Ventricle  | 0.050    | 0.681          | 0.759                   |
| IRDA/IRTA per min before HV           | Left Thalamus           | 0.072    | 0.555          | 0.718                   |
| IRDA/IRTA per min before HV           | Left Caudate            | 0.196    | 0.104          | 0.330                   |
| IRDA/IRTA per min before HV           | Left Putamen            | 0.186    | 0.124          | 0.330                   |
| IRDA/IRTA per min before HV           | Left Pallidum           | 0.130    | 0.285          | 0.507                   |
| IRDA/IRTA per min before HV           | Left Hippocampus        | 0.155    | 0.201          | 0.402                   |
| IRDA/IRTA per min before HV           | Left Amygdala           | 0.067    | 0.583          | 0.718                   |
| IRDA/IRTA per min before HV           | Left Accumbens area     | -0.045   | 0.711          | 0.759                   |
| IRDA/IRTA per min before HV           | Right Lateral Ventricle | 0.068    | 0.577          | 0.718                   |
| IRDA/IRTA per min before HV           | Right Thalamus          | 0.214    | 0.076          | 0.330                   |
| IRDA/IRTA per min before HV           | Right Caudate           | 0.202    | 0.093          | 0.330                   |
| IRDA/IRTA per min before HV           | Right Putamen           | 0.164    | 0.174          | 0.398                   |
| IRDA/IRTA per min before HV           | Right Pallidum          | 0.205    | 0.089          | 0.330                   |
| IRDA/IRTA per min before HV           | Right Hippocampus       | -0.003   | 0.978          | 0.978                   |
| IRDA/IRTA per min before HV           | Right Amygdala          | 0.205    | 0.089          | 0.330                   |
| IRDA/IRTA per min before HV           | Right Accumbens area    | -0.109   | 0.368          | 0.589                   |
| IRDA/IRTA per min before vs. after HV | Left Lateral Ventricle  | -0.028   | 0.820          | 0.959                   |
| IRDA/IRTA per min before vs. after HV | Left Thalamus           | -0.006   | 0.959          | 0.959                   |
| IRDA/IRTA per min before vs. after HV | Left Caudate            | 0.055    | 0.659          | 0.959                   |
| IRDA/IRTA per min before vs. after HV | Left Putamen            | -0.014   | 0.908          | 0.959                   |
| IRDA/IRTA per min before vs. after HV | Left Pallidum           | -0.175   | 0.157          | 0.677                   |
| IRDA/IRTA per min before vs. after HV | Left Hippocampus        | 0.258    | 0.035          | 0.313                   |
| IRDA/IRTA per min before vs. after HV | Left Amygdala           | 0.034    | 0.786          | 0.959                   |
| IRDA/IRTA per min before vs. after HV | Left Accumbens area     | 0.170    | 0.169          | 0.677                   |
| IRDA/IRTA per min before vs. after HV | Right Lateral Ventricle | 0.045    | 0.717          | 0.959                   |
| IRDA/IRTA per min before vs. after HV | Right Thalamus          | -0.058   | 0.639          | 0.959                   |
| IRDA/IRTA per min before vs. after HV | Right Caudate           | 0.037    | 0.765          | 0.959                   |
| IRDA/IRTA per min before vs. after HV | Right Putamen           | -0.008   | 0.946          | 0.959                   |
| IRDA/IRTA per min before vs. after HV | Right Pallidum          | -0.109   | 0.379          | 0.959                   |
| IRDA/IRTA per min before vs. after HV | Right Hippocampus       | 0.253    | 0.039          | 0.313                   |
| IRDA/IRTA per min before vs. after HV | Right Amygdala          | 0.092    | 0.457          | 0.959                   |
| IRDA/IRTA per min before vs. after HV | Right Accumbens area    | 0.043    | 0.731          | 0.959                   |

**Supplementary Table S4.** Correlations of electroencephalography findings and subcortical volumes of patients with borderline personality disorder. Abbreviations: *HV*, *hyperventilation*; *IRDA/IRTA*, *intermittent rhythmic delta/theta activity*.

| EEG (IRDA/IRTA)                       | Brain Region             | r      | p-value | adjusted p-value |
|---------------------------------------|--------------------------|--------|---------|------------------|
| IRDA/IRTA per min before HV           | GM/TIV corrected         | 0.105  | 0.389   | 0.705            |
| IRDA/IRTA per min before HV           | WM/TIV corrected         | 0.028  | 0.820   | 0.820            |
| IRDA/IRTA per min before HV           | CSF/TIV corrected        | -0.070 | 0.564   | 0.705            |
| IRDA/IRTA per min before HV           | TIV corrected            | 0.141  | 0.244   | 0.705            |
| IRDA/IRTA per min before HV           | Cerebellum/TIV corrected | 0.070  | 0.563   | 0.705            |
| IRDA/IRTA per min before vs. after HV | GM/TIV corrected         | -0.078 | 0.528   | 0.837            |
| IRDA/IRTA per min before vs. after HV | WM/TIV corrected         | -0.026 | 0.837   | 0.837            |
| IRDA/IRTA per min before vs. after HV | CSF/TIV corrected        | 0.085  | 0.495   | 0.837            |
| IRDA/IRTA per min before vs. after HV | TIV corrected            | 0.114  | 0.359   | 0.837            |
| IRDA/IRTA per min before vs. after HV | Cerebellum/TIV corrected | -0.028 | 0.820   | 0.837            |

**Supplementary Table S5.** Correlations of electroencephalography findings and global volume measures of patients with borderline personality disorder. Abbreviations: *CSF*, cerebrospinal fluid; *GM*, grey matter; *HV*, hyperventilation; *IRDA/IRTA*, intermittent rhythmic delta/theta activity; *TIV*, total intracranial volume; *WM*, white matter.

| Questionnaire | Brain Region                               | r      | p-value | Adjusted p-value |
|---------------|--------------------------------------------|--------|---------|------------------|
| BSL23 mean    | left banks of the superior temporal sulcus | 0.163  | 0.184   | 0.482            |
| BSL23 mean    | left caudal anterior cingulate             | 0.074  | 0.547   | 0.702            |
| BSL23 mean    | left caudal middle frontal                 | 0.154  | 0.209   | 0.486            |
| BSL23 mean    | left cuneus                                | 0.059  | 0.634   | 0.757            |
| BSL23 mean    | left entorhinal                            | 0.131  | 0.286   | 0.518            |
| BSL23 mean    | left frontal pole                          | 0.082  | 0.509   | 0.665            |
| BSL23 mean    | left fusiform                              | 0.198  | 0.106   | 0.424            |
| BSL23 mean    | left inferior parietal                     | 0.158  | 0.198   | 0.486            |
| BSL23 mean    | left inferior temporal                     | 0.201  | 0.100   | 0.424            |
| BSL23 mean    | left insula                                | 0.164  | 0.181   | 0.482            |
| BSL23 mean    | left isthmus cingulate                     | 0.117  | 0.342   | 0.542            |
| BSL23 mean    | left lateral occipital                     | -0.013 | 0.918   | 0.931            |
| BSL23 mean    | left lateral orbitofrontal                 | 0.146  | 0.235   | 0.515            |
| BSL23 mean    | left lingual                               | -0.033 | 0.789   | 0.852            |
| BSL23 mean    | left medial orbitofrontal                  | 0.126  | 0.304   | 0.518            |
| BSL23 mean    | left middle temporal                       | 0.280  | 0.021   | 0.424            |
| BSL23 mean    | left paracentral                           | -0.015 | 0.902   | 0.931            |
| BSL23 mean    | left parahippocampal                       | 0.101  | 0.411   | 0.585            |
| BSL23 mean    | left pars opercularis                      | 0.126  | 0.305   | 0.518            |
| BSL23 mean    | left pars orbitalis                        | 0.218  | 0.074   | 0.424            |
| BSL23 mean    | left pars triangularis                     | 0.195  | 0.112   | 0.424            |
| BSL23 mean    | left pericalcarine                         | 0.009  | 0.945   | 0.945            |
| BSL23 mean    | left postcentral                           | 0.154  | 0.210   | 0.486            |
| BSL23 mean    | left posterior cingulate                   | 0.119  | 0.335   | 0.542            |
| BSL23 mean    | left precentral                            | 0.065  | 0.599   | 0.741            |

|            |                                             |        |       |       |
|------------|---------------------------------------------|--------|-------|-------|
| BSL23 mean | left precuneus                              | 0.105  | 0.396 | 0.585 |
| BSL23 mean | left rostral anterior cingulate             | 0.189  | 0.122 | 0.424 |
| BSL23 mean | left rostral middle frontal                 | 0.120  | 0.328 | 0.542 |
| BSL23 mean | left superior frontal                       | 0.061  | 0.621 | 0.754 |
| BSL23 mean | left superior parietal                      | 0.054  | 0.664 | 0.779 |
| BSL23 mean | left superior temporal                      | 0.181  | 0.139 | 0.424 |
| BSL23 mean | left supramarginal                          | 0.194  | 0.113 | 0.424 |
| BSL23 mean | left temporal pole                          | 0.179  | 0.143 | 0.424 |
| BSL23 mean | left transverse temporal                    | 0.141  | 0.251 | 0.518 |
| BSL23 mean | right banks of the superior temporal sulcus | 0.262  | 0.031 | 0.424 |
| BSL23 mean | right caudal anterior cingulate             | 0.231  | 0.058 | 0.424 |
| BSL23 mean | right caudal middle frontal                 | 0.109  | 0.375 | 0.580 |
| BSL23 mean | right cuneus                                | 0.044  | 0.723 | 0.806 |
| BSL23 mean | right entorhinal                            | -0.037 | 0.762 | 0.836 |
| BSL23 mean | right frontal pole                          | 0.132  | 0.284 | 0.518 |
| BSL23 mean | right fusiform                              | 0.202  | 0.099 | 0.424 |
| BSL23 mean | right inferior parietal                     | 0.290  | 0.016 | 0.424 |
| BSL23 mean | right inferior temporal                     | 0.244  | 0.045 | 0.424 |
| BSL23 mean | right insula                                | 0.082  | 0.509 | 0.665 |
| BSL23 mean | right isthmus cingulate                     | -0.049 | 0.690 | 0.795 |
| BSL23 mean | right lateral occipital                     | -0.044 | 0.721 | 0.806 |
| BSL23 mean | right lateral orbitofrontal                 | 0.152  | 0.215 | 0.486 |
| BSL23 mean | right lingual                               | -0.014 | 0.912 | 0.931 |
| BSL23 mean | right medial orbitofrontal                  | 0.249  | 0.040 | 0.424 |
| BSL23 mean | right middle temporal                       | 0.185  | 0.132 | 0.424 |
| BSL23 mean | right paracentral                           | -0.097 | 0.429 | 0.595 |
| BSL23 mean | right parahippocampal                       | 0.028  | 0.822 | 0.873 |
| BSL23 mean | right pars opercularis                      | 0.138  | 0.263 | 0.518 |

|                     |                                            |        |            |       |
|---------------------|--------------------------------------------|--------|------------|-------|
| BSL23 mean          | right pars orbitalis                       | 0.181  | 0.139      | 0.424 |
| BSL23 mean          | right pars triangularis                    | 0.130  | 0.289      | 0.518 |
| BSL23 mean          | right pericalcarine                        | 0.131  | 0.286      | 0.518 |
| BSL23 mean          | right postcentral                          | 0.139  | 0.260      | 0.518 |
| BSL23 mean          | right posterior cingulate                  | 0.068  | 0.583      | 0.735 |
| BSL23 mean          | right precentral                           | 0.082  | 0.508      | 0.665 |
| BSL23 mean          | right precuneus                            | 0.163  | 0.184      | 0.482 |
| BSL23 mean          | right rostral anterior cingulate           | 0.411  | <0.00<br>1 | 0.034 |
| BSL23 mean          | right rostral middle frontal               | 0.222  | 0.069      | 0.424 |
| BSL23 mean          | right superior frontal                     | 0.107  | 0.384      | 0.581 |
| BSL23 mean          | right superior parietal                    | 0.101  | 0.413      | 0.585 |
| BSL23 mean          | right superior temporal                    | 0.201  | 0.101      | 0.424 |
| BSL23 mean          | right supramarginal                        | 0.185  | 0.130      | 0.424 |
| BSL23 mean          | right temporal pole                        | 0.257  | 0.034      | 0.424 |
| BSL23 mean          | right transverse temporal                  | 0.186  | 0.130      | 0.424 |
| BSL-supplement mean | left banks of the superior temporal sulcus | 0.258  | 0.034      | 0.314 |
| BSL-supplement mean | left caudal anterior cingulate             | 0.114  | 0.355      | 0.527 |
| BSL-supplement mean | left caudal middle frontal                 | 0.164  | 0.182      | 0.390 |
| BSL-supplement mean | left cuneus                                | 0.125  | 0.310      | 0.517 |
| BSL-supplement mean | left entorhinal                            | -0.004 | 0.974      | 0.988 |
| BSL-supplement mean | left frontal pole                          | 0.061  | 0.623      | 0.757 |
| BSL-supplement mean | left fusiform                              | 0.149  | 0.225      | 0.437 |
| BSL-supplement mean | left inferior parietal                     | 0.174  | 0.156      | 0.390 |
| BSL-supplement mean | left inferior temporal                     | 0.309  | 0.010      | 0.314 |
| BSL-supplement mean | left insula                                | 0.204  | 0.095      | 0.378 |
| BSL-supplement mean | left isthmus cingulate                     | 0.161  | 0.190      | 0.390 |
| BSL-supplement mean | left lateral occipital                     | 0.026  | 0.834      | 0.915 |
| BSL-supplement mean | left lateral orbitofrontal                 | 0.161  | 0.189      | 0.390 |

|                     |                                             |        |       |       |
|---------------------|---------------------------------------------|--------|-------|-------|
| BSL-supplement mean | left lingual                                | 0.128  | 0.300 | 0.517 |
| BSL-supplement mean | left medial orbitofrontal                   | 0.201  | 0.100 | 0.378 |
| BSL-supplement mean | left middle temporal                        | 0.294  | 0.015 | 0.314 |
| BSL-supplement mean | left paracentral                            | -0.061 | 0.623 | 0.757 |
| BSL-supplement mean | left parahippocampal                        | 0.176  | 0.150 | 0.390 |
| BSL-supplement mean | left pars opercularis                       | 0.127  | 0.302 | 0.517 |
| BSL-supplement mean | left pars orbitalis                         | 0.155  | 0.208 | 0.416 |
| BSL-supplement mean | left pars triangularis                      | 0.248  | 0.042 | 0.314 |
| BSL-supplement mean | left pericalcarine                          | 0.169  | 0.168 | 0.390 |
| BSL-supplement mean | left postcentral                            | 0.045  | 0.715 | 0.824 |
| BSL-supplement mean | left posterior cingulate                    | 0.161  | 0.188 | 0.390 |
| BSL-supplement mean | left precentral                             | 0.020  | 0.870 | 0.939 |
| BSL-supplement mean | left precuneus                              | 0.089  | 0.470 | 0.641 |
| BSL-supplement mean | left rostral anterior cingulate             | 0.046  | 0.710 | 0.824 |
| BSL-supplement mean | left rostral middle frontal                 | 0.114  | 0.357 | 0.527 |
| BSL-supplement mean | left superior frontal                       | 0.068  | 0.580 | 0.735 |
| BSL-supplement mean | left superior parietal                      | -0.009 | 0.944 | 0.972 |
| BSL-supplement mean | left superior temporal                      | 0.175  | 0.154 | 0.390 |
| BSL-supplement mean | left supramarginal                          | 0.121  | 0.327 | 0.517 |
| BSL-supplement mean | left temporal pole                          | 0.123  | 0.316 | 0.517 |
| BSL-supplement mean | left transverse temporal                    | 0.076  | 0.537 | 0.702 |
| BSL-supplement mean | right banks of the superior temporal sulcus | 0.313  | 0.009 | 0.314 |
| BSL-supplement mean | right caudal anterior cingulate             | 0.218  | 0.074 | 0.360 |
| BSL-supplement mean | right caudal middle frontal                 | 0.135  | 0.272 | 0.513 |
| BSL-supplement mean | right cuneus                                | 0.087  | 0.479 | 0.641 |
| BSL-supplement mean | right entorhinal                            | -0.166 | 0.177 | 0.390 |
| BSL-supplement mean | right frontal pole                          | 0.013  | 0.918 | 0.969 |
| BSL-supplement mean | right fusiform                              | 0.230  | 0.059 | 0.360 |



|                     |                                            |        |       |       |
|---------------------|--------------------------------------------|--------|-------|-------|
| BSL-supplement mean | right inferior parietal                    | 0.221  | 0.069 | 0.360 |
| BSL-supplement mean | right inferior temporal                    | 0.261  | 0.032 | 0.314 |
| BSL-supplement mean | right insula                               | 0.204  | 0.095 | 0.378 |
| BSL-supplement mean | right isthmus cingulate                    | -0.042 | 0.736 | 0.835 |
| BSL-supplement mean | right lateral occipital                    | 0.119  | 0.335 | 0.518 |
| BSL-supplement mean | right lateral orbitofrontal                | 0.194  | 0.114 | 0.390 |
| BSL-supplement mean | right lingual                              | 0.047  | 0.705 | 0.824 |
| BSL-supplement mean | right medial orbitofrontal                 | 0.187  | 0.127 | 0.390 |
| BSL-supplement mean | right middle temporal                      | 0.167  | 0.173 | 0.390 |
| BSL-supplement mean | right paracentral                          | -0.126 | 0.305 | 0.517 |
| BSL-supplement mean | right parahippocampal                      | -0.068 | 0.583 | 0.735 |
| BSL-supplement mean | right pars opercularis                     | 0.223  | 0.067 | 0.360 |
| BSL-supplement mean | right pars orbitalis                       | 0.180  | 0.143 | 0.390 |
| BSL-supplement mean | right pars triangularis                    | 0.207  | 0.091 | 0.378 |
| BSL-supplement mean | right pericalcarine                        | 0.122  | 0.323 | 0.517 |
| BSL-supplement mean | right postcentral                          | -0.011 | 0.926 | 0.969 |
| BSL-supplement mean | right posterior cingulate                  | -0.001 | 0.996 | 0.996 |
| BSL-supplement mean | right precentral                           | -0.030 | 0.810 | 0.903 |
| BSL-supplement mean | right precuneus                            | 0.191  | 0.119 | 0.390 |
| BSL-supplement mean | right rostral anterior cingulate           | 0.233  | 0.056 | 0.360 |
| BSL-supplement mean | right rostral middle frontal               | 0.188  | 0.124 | 0.390 |
| BSL-supplement mean | right superior frontal                     | 0.109  | 0.378 | 0.546 |
| BSL-supplement mean | right superior parietal                    | 0.100  | 0.415 | 0.588 |
| BSL-supplement mean | right superior temporal                    | 0.251  | 0.039 | 0.314 |
| BSL-supplement mean | right supramarginal                        | 0.087  | 0.481 | 0.641 |
| BSL-supplement mean | right temporal pole                        | 0.264  | 0.030 | 0.314 |
| BSL-supplement mean | right transverse temporal                  | 0.276  | 0.023 | 0.314 |
| IPDE borderline     | left banks of the superior temporal sulcus | 0.270  | 0.026 | 0.344 |

|                 |                                 |        |       |       |
|-----------------|---------------------------------|--------|-------|-------|
| IPDE borderline | left caudal anterior cingulate  | 0.015  | 0.901 | 0.958 |
| IPDE borderline | left caudal middle frontal      | 0.126  | 0.306 | 0.535 |
| IPDE borderline | left cuneus                     | 0.216  | 0.076 | 0.415 |
| IPDE borderline | left entorhinal                 | -0.034 | 0.783 | 0.887 |
| IPDE borderline | left frontal pole               | 0.133  | 0.281 | 0.531 |
| IPDE borderline | left fusiform                   | 0.175  | 0.153 | 0.441 |
| IPDE borderline | left inferior parietal          | 0.134  | 0.276 | 0.531 |
| IPDE borderline | left inferior temporal          | 0.174  | 0.155 | 0.441 |
| IPDE borderline | left insula                     | 0.152  | 0.217 | 0.481 |
| IPDE borderline | left isthmus cingulate          | 0.123  | 0.318 | 0.535 |
| IPDE borderline | left lateral occipital          | -0.124 | 0.315 | 0.535 |
| IPDE borderline | left lateral orbitofrontal      | 0.123  | 0.319 | 0.535 |
| IPDE borderline | left lingual                    | 0.010  | 0.933 | 0.963 |
| IPDE borderline | left medial orbitofrontal       | 0.042  | 0.736 | 0.863 |
| IPDE borderline | left middle temporal            | 0.234  | 0.055 | 0.415 |
| IPDE borderline | left paracentral                | -0.022 | 0.858 | 0.941 |
| IPDE borderline | left parahippocampal            | -0.004 | 0.974 | 0.974 |
| IPDE borderline | left pars opercularis           | 0.225  | 0.064 | 0.415 |
| IPDE borderline | left pars orbitalis             | 0.086  | 0.484 | 0.686 |
| IPDE borderline | left pars triangularis          | 0.195  | 0.111 | 0.420 |
| IPDE borderline | left pericalcarine              | 0.028  | 0.821 | 0.915 |
| IPDE borderline | left postcentral                | 0.174  | 0.156 | 0.441 |
| IPDE borderline | left posterior cingulate        | 0.070  | 0.568 | 0.773 |
| IPDE borderline | left precentral                 | 0.093  | 0.451 | 0.667 |
| IPDE borderline | left precuneus                  | 0.116  | 0.346 | 0.559 |
| IPDE borderline | left rostral anterior cingulate | 0.018  | 0.886 | 0.957 |
| IPDE borderline | left rostral middle frontal     | 0.187  | 0.126 | 0.428 |
| IPDE borderline | left superior frontal           | 0.087  | 0.479 | 0.686 |

|                 |                                             |        |       |       |
|-----------------|---------------------------------------------|--------|-------|-------|
| IPDE borderline | left superior parietal                      | 0.055  | 0.654 | 0.828 |
| IPDE borderline | left superior temporal                      | 0.256  | 0.035 | 0.344 |
| IPDE borderline | left supramarginal                          | 0.181  | 0.139 | 0.441 |
| IPDE borderline | left temporal pole                          | 0.007  | 0.956 | 0.970 |
| IPDE borderline | left transverse temporal                    | 0.146  | 0.235 | 0.497 |
| IPDE borderline | right banks of the superior temporal sulcus | 0.110  | 0.372 | 0.588 |
| IPDE borderline | right caudal anterior cingulate             | 0.152  | 0.215 | 0.481 |
| IPDE borderline | right caudal middle frontal                 | 0.151  | 0.218 | 0.481 |
| IPDE borderline | right cuneus                                | 0.010  | 0.935 | 0.963 |
| IPDE borderline | right entorhinal                            | 0.050  | 0.686 | 0.828 |
| IPDE borderline | right frontal pole                          | 0.151  | 0.219 | 0.481 |
| IPDE borderline | right fusiform                              | 0.188  | 0.125 | 0.428 |
| IPDE borderline | right inferior parietal                     | 0.159  | 0.194 | 0.481 |
| IPDE borderline | right inferior temporal                     | 0.248  | 0.041 | 0.350 |
| IPDE borderline | right insula                                | 0.293  | 0.015 | 0.344 |
| IPDE borderline | right isthmus cingulate                     | -0.053 | 0.666 | 0.828 |
| IPDE borderline | right lateral occipital                     | 0.049  | 0.690 | 0.828 |
| IPDE borderline | right lateral orbitofrontal                 | 0.151  | 0.218 | 0.481 |
| IPDE borderline | right lingual                               | 0.038  | 0.759 | 0.874 |
| IPDE borderline | right medial orbitofrontal                  | 0.211  | 0.085 | 0.415 |
| IPDE borderline | right middle temporal                       | 0.206  | 0.092 | 0.415 |
| IPDE borderline | right paracentral                           | -0.122 | 0.322 | 0.535 |
| IPDE borderline | right parahippocampal                       | -0.049 | 0.694 | 0.828 |
| IPDE borderline | right pars opercularis                      | 0.108  | 0.382 | 0.590 |
| IPDE borderline | right pars orbitalis                        | 0.196  | 0.109 | 0.420 |
| IPDE borderline | right pars triangularis                     | 0.144  | 0.241 | 0.497 |
| IPDE borderline | right pericalcarine                         | 0.082  | 0.506 | 0.702 |
| IPDE borderline | right postcentral                           | 0.166  | 0.176 | 0.477 |

|                 |                                            |        |       |       |
|-----------------|--------------------------------------------|--------|-------|-------|
| IPDE borderline | right posterior cingulate                  | 0.141  | 0.250 | 0.501 |
| IPDE borderline | right precentral                           | 0.059  | 0.631 | 0.825 |
| IPDE borderline | right precuneus                            | 0.064  | 0.603 | 0.804 |
| IPDE borderline | right rostral anterior cingulate           | 0.284  | 0.019 | 0.344 |
| IPDE borderline | right rostral middle frontal               | 0.209  | 0.087 | 0.415 |
| IPDE borderline | right superior frontal                     | 0.202  | 0.099 | 0.420 |
| IPDE borderline | right superior parietal                    | 0.101  | 0.411 | 0.622 |
| IPDE borderline | right superior temporal                    | 0.261  | 0.032 | 0.344 |
| IPDE borderline | right supramarginal                        | 0.216  | 0.077 | 0.415 |
| IPDE borderline | right temporal pole                        | 0.285  | 0.018 | 0.344 |
| IPDE borderline | right transverse temporal                  | 0.256  | 0.035 | 0.344 |
| IPO mean        | left banks of the superior temporal sulcus | 0.259  | 0.034 | 0.129 |
| IPO mean        | left caudal anterior cingulate             | 0.013  | 0.917 | 0.944 |
| IPO mean        | left caudal middle frontal                 | 0.293  | 0.016 | 0.104 |
| IPO mean        | left cuneus                                | 0.263  | 0.031 | 0.129 |
| IPO mean        | left entorhinal                            | 0.061  | 0.625 | 0.726 |
| IPO mean        | left frontal pole                          | 0.043  | 0.727 | 0.797 |
| IPO mean        | left fusiform                              | 0.279  | 0.022 | 0.127 |
| IPO mean        | left inferior parietal                     | 0.197  | 0.111 | 0.215 |
| IPO mean        | left inferior temporal                     | 0.235  | 0.055 | 0.163 |
| IPO mean        | left insula                                | 0.202  | 0.101 | 0.215 |
| IPO mean        | left isthmus cingulate                     | 0.154  | 0.213 | 0.326 |
| IPO mean        | left lateral occipital                     | -0.028 | 0.820 | 0.872 |
| IPO mean        | left lateral orbitofrontal                 | 0.173  | 0.160 | 0.260 |
| IPO mean        | left lingual                               | 0.123  | 0.321 | 0.455 |
| IPO mean        | left medial orbitofrontal                  | 0.146  | 0.239 | 0.353 |
| IPO mean        | left middle temporal                       | 0.332  | 0.006 | 0.096 |
| IPO mean        | left paracentral                           | 0.060  | 0.630 | 0.726 |

|          |                                             |        |       |       |
|----------|---------------------------------------------|--------|-------|-------|
| IPO mean | left parahippocampal                        | 0.176  | 0.154 | 0.256 |
| IPO mean | left pars opercularis                       | 0.264  | 0.031 | 0.129 |
| IPO mean | left pars orbitalis                         | 0.110  | 0.377 | 0.503 |
| IPO mean | left pars triangularis                      | 0.296  | 0.015 | 0.104 |
| IPO mean | left pericalcarine                          | 0.068  | 0.582 | 0.695 |
| IPO mean | left postcentral                            | 0.183  | 0.138 | 0.235 |
| IPO mean | left posterior cingulate                    | 0.185  | 0.135 | 0.235 |
| IPO mean | left precentral                             | 0.153  | 0.216 | 0.326 |
| IPO mean | left precuneus                              | 0.201  | 0.102 | 0.215 |
| IPO mean | left rostral anterior cingulate             | 0.114  | 0.358 | 0.488 |
| IPO mean | left rostral middle frontal                 | 0.246  | 0.045 | 0.160 |
| IPO mean | left superior frontal                       | 0.203  | 0.100 | 0.215 |
| IPO mean | left superior parietal                      | 0.101  | 0.418 | 0.536 |
| IPO mean | left superior temporal                      | 0.298  | 0.014 | 0.104 |
| IPO mean | left supramarginal                          | 0.260  | 0.034 | 0.129 |
| IPO mean | left temporal pole                          | 0.198  | 0.108 | 0.215 |
| IPO mean | left transverse temporal                    | 0.171  | 0.165 | 0.262 |
| IPO mean | right banks of the superior temporal sulcus | 0.144  | 0.246 | 0.357 |
| IPO mean | right caudal anterior cingulate             | 0.355  | 0.003 | 0.073 |
| IPO mean | right caudal middle frontal                 | 0.291  | 0.017 | 0.104 |
| IPO mean | right cuneus                                | 0.114  | 0.359 | 0.488 |
| IPO mean | right entorhinal                            | -0.083 | 0.505 | 0.624 |
| IPO mean | right frontal pole                          | 0.071  | 0.565 | 0.687 |
| IPO mean | right fusiform                              | 0.190  | 0.123 | 0.220 |
| IPO mean | right inferior parietal                     | 0.264  | 0.031 | 0.129 |
| IPO mean | right inferior temporal                     | 0.310  | 0.011 | 0.104 |
| IPO mean | right insula                                | 0.197  | 0.111 | 0.215 |
| IPO mean | right isthmus cingulate                     | -0.035 | 0.776 | 0.838 |

|            |                                            |       |            |       |
|------------|--------------------------------------------|-------|------------|-------|
| IPO mean   | right lateral occipital                    | 0.058 | 0.643      | 0.729 |
| IPO mean   | right lateral orbitofrontal                | 0.190 | 0.123      | 0.220 |
| IPO mean   | right lingual                              | 0.000 | 0.998      | 0.998 |
| IPO mean   | right medial orbitofrontal                 | 0.241 | 0.049      | 0.160 |
| IPO mean   | right middle temporal                      | 0.233 | 0.057      | 0.163 |
| IPO mean   | right paracentral                          | 0.021 | 0.869      | 0.909 |
| IPO mean   | right parahippocampal                      | 0.010 | 0.936      | 0.950 |
| IPO mean   | right pars opercularis                     | 0.227 | 0.065      | 0.176 |
| IPO mean   | right pars orbitalis                       | 0.215 | 0.080      | 0.202 |
| IPO mean   | right pars triangularis                    | 0.205 | 0.096      | 0.215 |
| IPO mean   | right pericalcarine                        | 0.048 | 0.702      | 0.782 |
| IPO mean   | right postcentral                          | 0.105 | 0.397      | 0.519 |
| IPO mean   | right posterior cingulate                  | 0.216 | 0.079      | 0.202 |
| IPO mean   | right precentral                           | 0.090 | 0.467      | 0.588 |
| IPO mean   | right precuneus                            | 0.243 | 0.048      | 0.160 |
| IPO mean   | right rostral anterior cingulate           | 0.397 | <0.00<br>1 | 0.030 |
| IPO mean   | right rostral middle frontal               | 0.297 | 0.015      | 0.104 |
| IPO mean   | right superior frontal                     | 0.237 | 0.053      | 0.163 |
| IPO mean   | right superior parietal                    | 0.192 | 0.120      | 0.220 |
| IPO mean   | right superior temporal                    | 0.259 | 0.034      | 0.129 |
| IPO mean   | right supramarginal                        | 0.200 | 0.105      | 0.215 |
| IPO mean   | right temporal pole                        | 0.413 | <0.00<br>1 | 0.030 |
| IPO mean   | right transverse temporal                  | 0.326 | 0.007      | 0.096 |
| DERS total | left banks of the superior temporal sulcus | 0.135 | 0.287      | 0.456 |
| DERS total | left caudal anterior cingulate             | 0.071 | 0.575      | 0.686 |
| DERS total | left caudal middle frontal                 | 0.195 | 0.123      | 0.278 |
| DERS total | left cuneus                                | 0.146 | 0.250      | 0.435 |

|            |                                 |        |       |       |
|------------|---------------------------------|--------|-------|-------|
| DERS total | left entorhinal                 | 0.082  | 0.521 | 0.651 |
| DERS total | left frontal pole               | 0.103  | 0.419 | 0.559 |
| DERS total | left fusiform                   | 0.328  | 0.008 | 0.208 |
| DERS total | left inferior parietal          | 0.242  | 0.054 | 0.215 |
| DERS total | left inferior temporal          | 0.279  | 0.026 | 0.208 |
| DERS total | left insula                     | 0.118  | 0.353 | 0.490 |
| DERS total | left isthmus cingulate          | 0.142  | 0.262 | 0.435 |
| DERS total | left lateral occipital          | 0.040  | 0.751 | 0.785 |
| DERS total | left lateral orbitofrontal      | 0.231  | 0.066 | 0.225 |
| DERS total | left lingual                    | 0.197  | 0.119 | 0.278 |
| DERS total | left medial orbitofrontal       | 0.115  | 0.366 | 0.498 |
| DERS total | left middle temporal            | 0.248  | 0.049 | 0.215 |
| DERS total | left paracentral                | -0.023 | 0.858 | 0.858 |
| DERS total | left parahippocampal            | 0.061  | 0.630 | 0.714 |
| DERS total | left pars opercularis           | 0.204  | 0.106 | 0.260 |
| DERS total | left pars orbitalis             | 0.203  | 0.107 | 0.260 |
| DERS total | left pars triangularis          | 0.260  | 0.038 | 0.213 |
| DERS total | left pericalcarine              | 0.055  | 0.665 | 0.729 |
| DERS total | left postcentral                | 0.171  | 0.177 | 0.364 |
| DERS total | left posterior cingulate        | 0.124  | 0.328 | 0.484 |
| DERS total | left precentral                 | 0.129  | 0.310 | 0.479 |
| DERS total | left precuneus                  | 0.224  | 0.076 | 0.234 |
| DERS total | left rostral anterior cingulate | 0.148  | 0.242 | 0.435 |
| DERS total | left rostral middle frontal     | 0.227  | 0.071 | 0.229 |
| DERS total | left superior frontal           | 0.125  | 0.324 | 0.484 |
| DERS total | left superior parietal          | 0.066  | 0.606 | 0.710 |
| DERS total | left superior temporal          | 0.238  | 0.058 | 0.220 |
| DERS total | left supramarginal              | 0.274  | 0.029 | 0.208 |

|            |                                             |        |       |       |
|------------|---------------------------------------------|--------|-------|-------|
| DERS total | left temporal pole                          | 0.034  | 0.787 | 0.811 |
| DERS total | left transverse temporal                    | 0.246  | 0.050 | 0.215 |
| DERS total | right banks of the superior temporal sulcus | 0.057  | 0.654 | 0.729 |
| DERS total | right caudal anterior cingulate             | 0.242  | 0.054 | 0.215 |
| DERS total | right caudal middle frontal                 | 0.151  | 0.233 | 0.435 |
| DERS total | right cuneus                                | 0.049  | 0.698 | 0.745 |
| DERS total | right entorhinal                            | -0.063 | 0.622 | 0.714 |
| DERS total | right frontal pole                          | 0.156  | 0.219 | 0.435 |
| DERS total | right fusiform                              | 0.286  | 0.022 | 0.208 |
| DERS total | right inferior parietal                     | 0.301  | 0.016 | 0.208 |
| DERS total | right inferior temporal                     | 0.329  | 0.008 | 0.208 |
| DERS total | right insula                                | 0.272  | 0.029 | 0.208 |
| DERS total | right isthmus cingulate                     | -0.085 | 0.506 | 0.649 |
| DERS total | right lateral occipital                     | 0.081  | 0.527 | 0.651 |
| DERS total | right lateral orbitofrontal                 | 0.270  | 0.031 | 0.208 |
| DERS total | right lingual                               | 0.123  | 0.335 | 0.484 |
| DERS total | right medial orbitofrontal                  | 0.246  | 0.050 | 0.215 |
| DERS total | right middle temporal                       | 0.266  | 0.034 | 0.210 |
| DERS total | right paracentral                           | -0.032 | 0.800 | 0.812 |
| DERS total | right parahippocampal                       | 0.093  | 0.465 | 0.608 |
| DERS total | right pars opercularis                      | 0.152  | 0.232 | 0.435 |
| DERS total | right pars orbitalis                        | 0.235  | 0.062 | 0.221 |
| DERS total | right pars triangularis                     | 0.214  | 0.090 | 0.254 |
| DERS total | right pericalcarine                         | 0.135  | 0.288 | 0.456 |
| DERS total | right postcentral                           | 0.076  | 0.548 | 0.666 |
| DERS total | right posterior cingulate                   | 0.210  | 0.095 | 0.254 |
| DERS total | right precentral                            | 0.049  | 0.701 | 0.745 |
| DERS total | right precuneus                             | 0.210  | 0.096 | 0.254 |



|            |                                            |       |       |       |
|------------|--------------------------------------------|-------|-------|-------|
| DERS total | right rostral anterior cingulate           | 0.304 | 0.015 | 0.208 |
| DERS total | right rostral middle frontal               | 0.286 | 0.022 | 0.208 |
| DERS total | right superior frontal                     | 0.143 | 0.259 | 0.435 |
| DERS total | right superior parietal                    | 0.119 | 0.351 | 0.490 |
| DERS total | right superior temporal                    | 0.185 | 0.142 | 0.302 |
| DERS total | right supramarginal                        | 0.188 | 0.138 | 0.302 |
| DERS total | right temporal pole                        | 0.209 | 0.097 | 0.254 |
| DERS total | right transverse temporal                  | 0.148 | 0.244 | 0.435 |
| FDS20 mean | left banks of the superior temporal sulcus | 0.287 | 0.018 | 0.104 |
| FDS20 mean | left caudal anterior cingulate             | 0.100 | 0.415 | 0.463 |
| FDS20 mean | left caudal middle frontal                 | 0.316 | 0.009 | 0.089 |
| FDS20 mean | left cuneus                                | 0.213 | 0.082 | 0.150 |
| FDS20 mean | left entorhinal                            | 0.069 | 0.578 | 0.597 |
| FDS20 mean | left frontal pole                          | 0.205 | 0.094 | 0.164 |
| FDS20 mean | left fusiform                              | 0.314 | 0.009 | 0.089 |
| FDS20 mean | left inferior parietal                     | 0.261 | 0.032 | 0.104 |
| FDS20 mean | left inferior temporal                     | 0.280 | 0.021 | 0.104 |
| FDS20 mean | left insula                                | 0.067 | 0.588 | 0.597 |
| FDS20 mean | left isthmus cingulate                     | 0.177 | 0.150 | 0.203 |
| FDS20 mean | left lateral occipital                     | 0.230 | 0.059 | 0.122 |
| FDS20 mean | left lateral orbitofrontal                 | 0.257 | 0.034 | 0.104 |
| FDS20 mean | left lingual                               | 0.234 | 0.054 | 0.122 |
| FDS20 mean | left medial orbitofrontal                  | 0.259 | 0.033 | 0.104 |
| FDS20 mean | left middle temporal                       | 0.300 | 0.013 | 0.097 |
| FDS20 mean | left paracentral                           | 0.178 | 0.146 | 0.203 |
| FDS20 mean | left parahippocampal                       | 0.232 | 0.057 | 0.122 |
| FDS20 mean | left pars opercularis                      | 0.179 | 0.143 | 0.203 |
| FDS20 mean | left pars orbitalis                        | 0.271 | 0.025 | 0.104 |

|            |                                             |        |       |       |
|------------|---------------------------------------------|--------|-------|-------|
| FDS20 mean | left pars triangularis                      | 0.285  | 0.018 | 0.104 |
| FDS20 mean | left pericalcarine                          | 0.216  | 0.077 | 0.146 |
| FDS20 mean | left postcentral                            | 0.139  | 0.260 | 0.315 |
| FDS20 mean | left posterior cingulate                    | 0.200  | 0.102 | 0.170 |
| FDS20 mean | left precentral                             | 0.181  | 0.139 | 0.203 |
| FDS20 mean | left precuneus                              | 0.264  | 0.030 | 0.104 |
| FDS20 mean | left rostral anterior cingulate             | 0.116  | 0.346 | 0.405 |
| FDS20 mean | left rostral middle frontal                 | 0.254  | 0.037 | 0.104 |
| FDS20 mean | left superior frontal                       | 0.147  | 0.230 | 0.285 |
| FDS20 mean | left superior parietal                      | 0.111  | 0.369 | 0.425 |
| FDS20 mean | left superior temporal                      | 0.261  | 0.031 | 0.104 |
| FDS20 mean | left supramarginal                          | 0.252  | 0.038 | 0.104 |
| FDS20 mean | left temporal pole                          | 0.189  | 0.123 | 0.193 |
| FDS20 mean | left transverse temporal                    | 0.108  | 0.381 | 0.432 |
| FDS20 mean | right banks of the superior temporal sulcus | 0.190  | 0.121 | 0.193 |
| FDS20 mean | right caudal anterior cingulate             | 0.305  | 0.011 | 0.097 |
| FDS20 mean | right caudal middle frontal                 | 0.188  | 0.125 | 0.193 |
| FDS20 mean | right cuneus                                | 0.167  | 0.173 | 0.231 |
| FDS20 mean | right entorhinal                            | -0.044 | 0.722 | 0.722 |
| FDS20 mean | right frontal pole                          | 0.245  | 0.044 | 0.110 |
| FDS20 mean | right fusiform                              | 0.261  | 0.032 | 0.104 |
| FDS20 mean | right inferior parietal                     | 0.375  | 0.002 | 0.089 |
| FDS20 mean | right inferior temporal                     | 0.336  | 0.005 | 0.089 |
| FDS20 mean | right insula                                | 0.184  | 0.134 | 0.203 |
| FDS20 mean | right isthmus cingulate                     | -0.095 | 0.443 | 0.486 |
| FDS20 mean | right lateral occipital                     | 0.272  | 0.025 | 0.104 |
| FDS20 mean | right lateral orbitofrontal                 | 0.314  | 0.009 | 0.089 |
| FDS20 mean | right lingual                               | 0.076  | 0.540 | 0.574 |

|            |                                            |        |       |       |
|------------|--------------------------------------------|--------|-------|-------|
| FDS20 mean | right medial orbitofrontal                 | 0.248  | 0.041 | 0.108 |
| FDS20 mean | right middle temporal                      | 0.273  | 0.024 | 0.104 |
| FDS20 mean | right paracentral                          | 0.079  | 0.520 | 0.561 |
| FDS20 mean | right parahippocampal                      | 0.148  | 0.227 | 0.285 |
| FDS20 mean | right pars opercularis                     | 0.234  | 0.055 | 0.122 |
| FDS20 mean | right pars orbitalis                       | 0.253  | 0.037 | 0.104 |
| FDS20 mean | right pars triangularis                    | 0.202  | 0.098 | 0.166 |
| FDS20 mean | right pericalcarine                        | 0.258  | 0.034 | 0.104 |
| FDS20 mean | right postcentral                          | 0.068  | 0.579 | 0.597 |
| FDS20 mean | right posterior cingulate                  | 0.227  | 0.063 | 0.122 |
| FDS20 mean | right precentral                           | 0.148  | 0.229 | 0.285 |
| FDS20 mean | right precuneus                            | 0.327  | 0.007 | 0.089 |
| FDS20 mean | right rostral anterior cingulate           | 0.323  | 0.007 | 0.089 |
| FDS20 mean | right rostral middle frontal               | 0.228  | 0.061 | 0.122 |
| FDS20 mean | right superior frontal                     | 0.179  | 0.145 | 0.203 |
| FDS20 mean | right superior parietal                    | 0.205  | 0.093 | 0.164 |
| FDS20 mean | right superior temporal                    | 0.240  | 0.048 | 0.117 |
| FDS20 mean | right supramarginal                        | 0.153  | 0.212 | 0.278 |
| FDS20 mean | right temporal pole                        | 0.228  | 0.061 | 0.122 |
| FDS20 mean | right transverse temporal                  | 0.132  | 0.282 | 0.336 |
| BDI-II sum | left banks of the superior temporal sulcus | 0.233  | 0.055 | 0.236 |
| BDI-II sum | left caudal anterior cingulate             | 0.074  | 0.548 | 0.653 |
| BDI-II sum | left caudal middle frontal                 | 0.191  | 0.119 | 0.247 |
| BDI-II sum | left cuneus                                | 0.068  | 0.579 | 0.679 |
| BDI-II sum | left entorhinal                            | 0.223  | 0.068 | 0.247 |
| BDI-II sum | left frontal pole                          | -0.014 | 0.908 | 0.965 |
| BDI-II sum | left fusiform                              | 0.260  | 0.032 | 0.183 |
| BDI-II sum | left inferior parietal                     | 0.246  | 0.043 | 0.220 |

|            |                                             |       |       |       |
|------------|---------------------------------------------|-------|-------|-------|
| BDI-II sum | left inferior temporal                      | 0.203 | 0.097 | 0.247 |
| BDI-II sum | left insula                                 | 0.189 | 0.123 | 0.247 |
| BDI-II sum | left isthmus cingulate                      | 0.157 | 0.201 | 0.325 |
| BDI-II sum | left lateral occipital                      | 0.101 | 0.411 | 0.518 |
| BDI-II sum | left lateral orbitofrontal                  | 0.219 | 0.072 | 0.247 |
| BDI-II sum | left lingual                                | 0.151 | 0.220 | 0.348 |
| BDI-II sum | left medial orbitofrontal                   | 0.196 | 0.109 | 0.247 |
| BDI-II sum | left middle temporal                        | 0.233 | 0.055 | 0.236 |
| BDI-II sum | left paracentral                            | 0.101 | 0.411 | 0.518 |
| BDI-II sum | left parahippocampal                        | 0.102 | 0.410 | 0.518 |
| BDI-II sum | left pars opercularis                       | 0.110 | 0.373 | 0.498 |
| BDI-II sum | left pars orbitalis                         | 0.272 | 0.025 | 0.180 |
| BDI-II sum | left pars triangularis                      | 0.311 | 0.010 | 0.168 |
| BDI-II sum | left pericalcarine                          | 0.030 | 0.807 | 0.871 |
| BDI-II sum | left postcentral                            | 0.203 | 0.098 | 0.247 |
| BDI-II sum | left posterior cingulate                    | 0.051 | 0.682 | 0.786 |
| BDI-II sum | left precentral                             | 0.097 | 0.430 | 0.532 |
| BDI-II sum | left precuneus                              | 0.127 | 0.301 | 0.445 |
| BDI-II sum | left rostral anterior cingulate             | 0.130 | 0.290 | 0.438 |
| BDI-II sum | left rostral middle frontal                 | 0.200 | 0.101 | 0.247 |
| BDI-II sum | left superior frontal                       | 0.140 | 0.256 | 0.396 |
| BDI-II sum | left superior parietal                      | 0.173 | 0.158 | 0.268 |
| BDI-II sum | left superior temporal                      | 0.272 | 0.025 | 0.180 |
| BDI-II sum | left supramarginal                          | 0.211 | 0.084 | 0.247 |
| BDI-II sum | left temporal pole                          | 0.120 | 0.328 | 0.448 |
| BDI-II sum | left transverse temporal                    | 0.265 | 0.029 | 0.180 |
| BDI-II sum | right banks of the superior temporal sulcus | 0.373 | 0.002 | 0.118 |
| BDI-II sum | right caudal anterior cingulate             | 0.183 | 0.136 | 0.254 |

|            |                                  |        |       |       |
|------------|----------------------------------|--------|-------|-------|
| BDI-II sum | right caudal middle frontal      | 0.120  | 0.329 | 0.448 |
| BDI-II sum | right cuneus                     | 0.186  | 0.130 | 0.252 |
| BDI-II sum | right entorhinal                 | -0.006 | 0.964 | 0.977 |
| BDI-II sum | right frontal pole               | 0.123  | 0.318 | 0.448 |
| BDI-II sum | right fusiform                   | 0.175  | 0.153 | 0.266 |
| BDI-II sum | right inferior parietal          | 0.316  | 0.009 | 0.168 |
| BDI-II sum | right inferior temporal          | 0.166  | 0.177 | 0.293 |
| BDI-II sum | right insula                     | 0.197  | 0.107 | 0.247 |
| BDI-II sum | right isthmus cingulate          | 0.004  | 0.977 | 0.977 |
| BDI-II sum | right lateral occipital          | 0.007  | 0.956 | 0.977 |
| BDI-II sum | right lateral orbitofrontal      | 0.191  | 0.119 | 0.247 |
| BDI-II sum | right lingual                    | 0.189  | 0.124 | 0.247 |
| BDI-II sum | right medial orbitofrontal       | 0.244  | 0.045 | 0.220 |
| BDI-II sum | right middle temporal            | 0.193  | 0.114 | 0.247 |
| BDI-II sum | right paracentral                | 0.042  | 0.735 | 0.806 |
| BDI-II sum | right parahippocampal            | 0.043  | 0.725 | 0.806 |
| BDI-II sum | right pars opercularis           | 0.125  | 0.308 | 0.445 |
| BDI-II sum | right pars orbitalis             | 0.316  | 0.009 | 0.168 |
| BDI-II sum | right pars triangularis          | 0.206  | 0.092 | 0.247 |
| BDI-II sum | right pericalcarine              | 0.198  | 0.105 | 0.247 |
| BDI-II sum | right postcentral                | 0.196  | 0.110 | 0.247 |
| BDI-II sum | right posterior cingulate        | 0.007  | 0.958 | 0.977 |
| BDI-II sum | right precentral                 | 0.085  | 0.489 | 0.594 |
| BDI-II sum | right precuneus                  | 0.212  | 0.083 | 0.247 |
| BDI-II sum | right rostral anterior cingulate | 0.285  | 0.019 | 0.180 |
| BDI-II sum | right rostral middle frontal     | 0.295  | 0.015 | 0.180 |
| BDI-II sum | right superior frontal           | 0.180  | 0.142 | 0.254 |
| BDI-II sum | right superior parietal          | 0.180  | 0.142 | 0.254 |

|            |                           |       |       |       |
|------------|---------------------------|-------|-------|-------|
| BDI-II sum | right superior temporal   | 0.268 | 0.027 | 0.180 |
| BDI-II sum | right supramarginal       | 0.191 | 0.119 | 0.247 |
| BDI-II sum | right temporal pole       | 0.043 | 0.725 | 0.806 |
| BDI-II sum | right transverse temporal | 0.287 | 0.018 | 0.180 |

**Supplementary Table S6.** Correlations of psychometric findings and cortical thickness of patients with borderline personality disorder. Abbreviations: *BDI*, Beck's depression inventory; *BSL*, borderline symptom list; *DEERS*, difficulties in emotion regulation scale; *FDS*, Freiburger Dissoziationsskala; *IPDE*, International Personality Disorder Examination; *IPO*, Inventory of Personality Organization.

| Questionnaire       | Brain Region            | r      | p-value | Adjusted p-value |
|---------------------|-------------------------|--------|---------|------------------|
| BSL23 mean          | Left Lateral Ventricle  | 0.039  | 0.754   | 0.928            |
| BSL23 mean          | Left Thalamus           | 0.012  | 0.920   | 0.945            |
| BSL23 mean          | Left Caudate            | 0.224  | 0.066   | 0.530            |
| BSL23 mean          | Left Putamen            | -0.011 | 0.929   | 0.945            |
| BSL23 mean          | Left Pallidum           | 0.082  | 0.508   | 0.815            |
| BSL23 mean          | Left Hippocampus        | 0.134  | 0.275   | 0.815            |
| BSL23 mean          | Left Amygdala           | 0.075  | 0.541   | 0.815            |
| BSL23 mean          | Left Accumbens area     | -0.008 | 0.945   | 0.945            |
| BSL23 mean          | Right Lateral Ventricle | 0.111  | 0.366   | 0.815            |
| BSL23 mean          | Right Thalamus          | -0.061 | 0.622   | 0.830            |
| BSL23 mean          | Right Caudate           | 0.253  | 0.037   | 0.530            |
| BSL23 mean          | Right Putamen           | 0.137  | 0.264   | 0.815            |
| BSL23 mean          | Right Pallidum          | 0.157  | 0.201   | 0.815            |
| BSL23 mean          | Right Hippocampus       | 0.094  | 0.446   | 0.815            |
| BSL23 mean          | Right Amygdala          | 0.072  | 0.560   | 0.815            |
| BSL23 mean          | Right Accumbens area    | -0.088 | 0.476   | 0.815            |
| BSL-supplement mean | Left Lateral Ventricle  | 0.150  | 0.222   | 0.510            |
| BSL-supplement mean | Left Thalamus           | 0.069  | 0.574   | 0.731            |
| BSL-supplement mean | Left Caudate            | 0.184  | 0.134   | 0.510            |
| BSL-supplement mean | Left Putamen            | 0.084  | 0.494   | 0.731            |
| BSL-supplement mean | Left Pallidum           | 0.114  | 0.355   | 0.632            |
| BSL-supplement mean | Left Hippocampus        | 0.171  | 0.163   | 0.510            |
| BSL-supplement mean | Left Amygdala           | -0.067 | 0.585   | 0.731            |
| BSL-supplement mean | Left Accumbens area     | 0.041  | 0.737   | 0.842            |
| BSL-supplement mean | Right Lateral Ventricle | 0.162  | 0.188   | 0.510            |
| BSL-supplement mean | Right Thalamus          | -0.013 | 0.919   | 0.958            |
| BSL-supplement mean | Right Caudate           | 0.191  | 0.118   | 0.510            |

|                     |                         |        |       |       |
|---------------------|-------------------------|--------|-------|-------|
| BSL-supplement mean | Right Putamen           | 0.191  | 0.119 | 0.510 |
| BSL-supplement mean | Right Pallidum          | 0.124  | 0.313 | 0.625 |
| BSL-supplement mean | Right Hippocampus       | 0.066  | 0.594 | 0.731 |
| BSL-supplement mean | Right Amygdala          | 0.007  | 0.958 | 0.958 |
| BSL-supplement mean | Right Accumbens area    | -0.150 | 0.223 | 0.510 |
| IPDE borderline     | Left Lateral Ventricle  | -0.085 | 0.490 | 0.944 |
| IPDE borderline     | Left Thalamus           | 0.121  | 0.325 | 0.944 |
| IPDE borderline     | Left Caudate            | 0.149  | 0.224 | 0.944 |
| IPDE borderline     | Left Putamen            | 0.005  | 0.969 | 0.969 |
| IPDE borderline     | Left Pallidum           | 0.015  | 0.903 | 0.963 |
| IPDE borderline     | Left Hippocampus        | 0.043  | 0.728 | 0.944 |
| IPDE borderline     | Left Amygdala           | 0.082  | 0.506 | 0.944 |
| IPDE borderline     | Left Accumbens area     | -0.023 | 0.851 | 0.963 |
| IPDE borderline     | Right Lateral Ventricle | -0.037 | 0.767 | 0.944 |
| IPDE borderline     | Right Thalamus          | 0.191  | 0.118 | 0.944 |
| IPDE borderline     | Right Caudate           | 0.178  | 0.146 | 0.944 |
| IPDE borderline     | Right Putamen           | 0.045  | 0.714 | 0.944 |
| IPDE borderline     | Right Pallidum          | 0.075  | 0.542 | 0.944 |
| IPDE borderline     | Right Hippocampus       | 0.052  | 0.675 | 0.944 |
| IPDE borderline     | Right Amygdala          | 0.087  | 0.481 | 0.944 |
| IPDE borderline     | Right Accumbens area    | 0.078  | 0.528 | 0.944 |
| IPO mean            | Left Lateral Ventricle  | -0.066 | 0.598 | 0.922 |
| IPO mean            | Left Thalamus           | 0.096  | 0.438 | 0.876 |
| IPO mean            | Left Caudate            | 0.104  | 0.402 | 0.876 |
| IPO mean            | Left Putamen            | 0.082  | 0.510 | 0.907 |
| IPO mean            | Left Pallidum           | 0.038  | 0.759 | 0.922 |
| IPO mean            | Left Hippocampus        | 0.041  | 0.742 | 0.922 |
| IPO mean            | Left Amygdala           | 0.012  | 0.922 | 0.922 |
| IPO mean            | Left Accumbens area     | 0.103  | 0.408 | 0.876 |
| IPO mean            | Right Lateral Ventricle | 0.043  | 0.731 | 0.922 |



|            |                         |        |       |       |
|------------|-------------------------|--------|-------|-------|
| IPO mean   | Right Thalamus          | 0.097  | 0.434 | 0.876 |
| IPO mean   | Right Caudate           | 0.149  | 0.229 | 0.876 |
| IPO mean   | Right Putamen           | 0.239  | 0.052 | 0.826 |
| IPO mean   | Right Pallidum          | 0.150  | 0.227 | 0.876 |
| IPO mean   | Right Hippocampus       | -0.016 | 0.898 | 0.922 |
| IPO mean   | Right Amygdala          | 0.118  | 0.341 | 0.876 |
| IPO mean   | Right Accumbens area    | 0.019  | 0.877 | 0.922 |
| DERS total | Left Lateral Ventricle  | -0.009 | 0.945 | 0.945 |
| DERS total | Left Thalamus           | 0.120  | 0.343 | 0.945 |
| DERS total | Left Caudate            | 0.130  | 0.306 | 0.945 |
| DERS total | Left Putamen            | -0.103 | 0.416 | 0.945 |
| DERS total | Left Pallidum           | -0.048 | 0.704 | 0.945 |
| DERS total | Left Hippocampus        | 0.086  | 0.499 | 0.945 |
| DERS total | Left Amygdala           | -0.045 | 0.725 | 0.945 |
| DERS total | Left Accumbens area     | -0.011 | 0.933 | 0.945 |
| DERS total | Right Lateral Ventricle | -0.011 | 0.930 | 0.945 |
| DERS total | Right Thalamus          | 0.036  | 0.777 | 0.945 |
| DERS total | Right Caudate           | 0.135  | 0.287 | 0.945 |
| DERS total | Right Putamen           | -0.010 | 0.936 | 0.945 |
| DERS total | Right Pallidum          | 0.058  | 0.646 | 0.945 |
| DERS total | Right Hippocampus       | 0.018  | 0.885 | 0.945 |
| DERS total | Right Amygdala          | -0.105 | 0.410 | 0.945 |
| DERS total | Right Accumbens area    | -0.091 | 0.473 | 0.945 |
| FDS20 mean | Left Lateral Ventricle  | 0.171  | 0.164 | 0.525 |
| FDS20 mean | Left Thalamus           | -0.084 | 0.498 | 0.735 |
| FDS20 mean | Left Caudate            | 0.077  | 0.533 | 0.735 |
| FDS20 mean | Left Putamen            | 0.070  | 0.570 | 0.735 |
| FDS20 mean | Left Pallidum           | 0.039  | 0.754 | 0.754 |
| FDS20 mean | Left Hippocampus        | 0.111  | 0.369 | 0.735 |
| FDS20 mean | Left Amygdala           | 0.091  | 0.460 | 0.735 |

|            |                         |        |       |       |
|------------|-------------------------|--------|-------|-------|
| FDS20 mean | Left Accumbens area     | 0.050  | 0.688 | 0.735 |
| FDS20 mean | Right Lateral Ventricle | 0.222  | 0.068 | 0.402 |
| FDS20 mean | Right Thalamus          | -0.060 | 0.630 | 0.735 |
| FDS20 mean | Right Caudate           | 0.078  | 0.526 | 0.735 |
| FDS20 mean | Right Putamen           | 0.217  | 0.075 | 0.402 |
| FDS20 mean | Right Pallidum          | 0.083  | 0.500 | 0.735 |
| FDS20 mean | Right Hippocampus       | 0.186  | 0.129 | 0.517 |
| FDS20 mean | Right Amygdala          | 0.221  | 0.070 | 0.402 |
| FDS20 mean | Right Accumbens area    | -0.049 | 0.689 | 0.735 |
| BDI-II sum | Left Lateral Ventricle  | 0.116  | 0.348 | 0.517 |
| BDI-II sum | Left Thalamus           | 0.158  | 0.198 | 0.453 |
| BDI-II sum | Left Caudate            | 0.189  | 0.123 | 0.453 |
| BDI-II sum | Left Putamen            | -0.013 | 0.918 | 0.918 |
| BDI-II sum | Left Pallidum           | 0.114  | 0.353 | 0.517 |
| BDI-II sum | Left Hippocampus        | 0.176  | 0.151 | 0.453 |
| BDI-II sum | Left Amygdala           | 0.109  | 0.378 | 0.517 |
| BDI-II sum | Left Accumbens area     | 0.099  | 0.420 | 0.517 |
| BDI-II sum | Right Lateral Ventricle | 0.190  | 0.121 | 0.453 |
| BDI-II sum | Right Thalamus          | 0.102  | 0.409 | 0.517 |
| BDI-II sum | Right Caudate           | 0.169  | 0.168 | 0.453 |
| BDI-II sum | Right Putamen           | 0.113  | 0.360 | 0.517 |
| BDI-II sum | Right Pallidum          | 0.164  | 0.180 | 0.453 |
| BDI-II sum | Right Hippocampus       | 0.068  | 0.581 | 0.664 |
| BDI-II sum | Right Amygdala          | 0.226  | 0.064 | 0.453 |
| BDI-II sum | Right Accumbens area    | 0.022  | 0.860 | 0.917 |

**Supplementary Table S7.** Correlations of psychometric findings and subcortical volumes of patients with borderline personality disorder. Abbreviations: *BDI*, Beck's depression inventory; *BSL*, borderline symptom list; *DERS*, difficulties in emotion regulation scale; *FDS*, Freiburger Dissoziationsskala; *IPDE*, International Personality Disorder Examination; *IPO*, Inventory of Personality Organization



| Questionnaire       | Brain Region             | r      | p-value | adjusted p-value |
|---------------------|--------------------------|--------|---------|------------------|
| BSL23 mean          | GM/TIV corrected         | -0.088 | 0.476   | 0.891            |
| BSL23 mean          | WM/TIV corrected         | 0.017  | 0.891   | 0.891            |
| BSL23 mean          | CSF/TIV corrected        | 0.059  | 0.634   | 0.891            |
| BSL23 mean          | TIV corrected            | -0.018 | 0.883   | 0.891            |
| BSL23 mean          | Cerebellum/TIV corrected | 0.022  | 0.860   | 0.891            |
| BSL-supplement mean | GM/TIV corrected         | -0.019 | 0.876   | 0.946            |
| BSL-supplement mean | WM/TIV corrected         | 0.052  | 0.671   | 0.946            |
| BSL-supplement mean | CSF/TIV corrected        | 0.008  | 0.946   | 0.946            |
| BSL-supplement mean | TIV corrected            | 0.101  | 0.411   | 0.946            |
| BSL-supplement mean | Cerebellum/TIV corrected | -0.081 | 0.512   | 0.946            |
| IPDE borderline     | GM/TIV corrected         | -0.029 | 0.812   | 0.956            |
| IPDE borderline     | WM/TIV corrected         | -0.065 | 0.601   | 0.956            |
| IPDE borderline     | CSF/TIV corrected        | 0.049  | 0.691   | 0.956            |
| IPDE borderline     | TIV corrected            | 0.110  | 0.370   | 0.956            |
| IPDE borderline     | Cerebellum/TIV corrected | -0.007 | 0.956   | 0.956            |
| IPO mean            | GM/TIV corrected         | 0.128  | 0.303   | 0.873            |
| IPO mean            | WM/TIV corrected         | -0.068 | 0.586   | 0.873            |
| IPO mean            | CSF/TIV corrected        | -0.034 | 0.785   | 0.873            |
| IPO mean            | TIV corrected            | -0.044 | 0.722   | 0.873            |
| IPO mean            | Cerebellum/TIV corrected | 0.020  | 0.873   | 0.873            |
| DERS total          | GM/TIV corrected         | 0.057  | 0.653   | 0.653            |
| DERS total          | WM/TIV corrected         | -0.166 | 0.191   | 0.653            |
| DERS total          | CSF/TIV corrected        | 0.076  | 0.552   | 0.653            |
| DERS total          | TIV corrected            | -0.059 | 0.642   | 0.653            |
| DERS total          | Cerebellum/TIV corrected | 0.074  | 0.563   | 0.653            |
| FDS20 mean          | GM/TIV corrected         | 0.042  | 0.734   | 0.874            |
| FDS20 mean          | WM/TIV corrected         | -0.122 | 0.322   | 0.874            |
| FDS20 mean          | CSF/TIV corrected        | 0.063  | 0.611   | 0.874            |
| FDS20 mean          | TIV corrected            | 0.026  | 0.831   | 0.874            |
| FDS20 mean          | Cerebellum/TIV corrected | 0.020  | 0.874   | 0.874            |
| BDI-II sum          | GM/TIV corrected         | 0.134  | 0.274   | 0.274            |
| BDI-II sum          | WM/TIV corrected         | 0.152  | 0.216   | 0.274            |
| BDI-II sum          | CSF/TIV corrected        | -0.174 | 0.156   | 0.274            |

|            |                          |        |       |       |
|------------|--------------------------|--------|-------|-------|
| BDI-II sum | TIV corrected            | -0.232 | 0.057 | 0.274 |
| BDI-II sum | Cerebellum/TIV corrected | 0.135  | 0.272 | 0.274 |

**Supplementary Table S8.** Correlations of psychometric findings and global volume measures of patients with borderline personality disorder. Abbreviations: *BDI*, Beck's depression inventory; *BSL*, borderline symptom list; *CSF*, cerebrospinal fluid; *DEERS*, difficulties in emotion regulation scale; *FDS*, Freiburger Dissoziationsskala; *GM*, grey matter; *IPDE*, International Personality Disorder Examination; *IPO*, Inventory of Personality Organization; *TIV*, total intracranial volume; *WM*, white matter.

| Neuropsychological Test | Brain Region                               | r      | p-value | adjusted<br>p-value |
|-------------------------|--------------------------------------------|--------|---------|---------------------|
| IQ CFT20R               | left banks of the superior temporal sulcus | 0.105  | 0.425   | 0.994               |
| IQ CFT20R               | left caudal anterior cingulate             | 0.160  | 0.222   | 0.994               |
| IQ CFT20R               | left caudal middle frontal                 | 0.083  | 0.530   | 0.994               |
| IQ CFT20R               | left cuneus                                | 0.054  | 0.681   | 0.994               |
| IQ CFT20R               | left entorhinal                            | 0.091  | 0.492   | 0.994               |
| IQ CFT20R               | left frontal pole                          | -0.058 | 0.657   | 0.994               |
| IQ CFT20R               | left fusiform                              | 0.063  | 0.630   | 0.994               |
| IQ CFT20R               | left inferior parietal                     | -0.010 | 0.942   | 0.994               |
| IQ CFT20R               | left inferior temporal                     | -0.042 | 0.748   | 0.994               |
| IQ CFT20R               | left insula                                | 0.103  | 0.434   | 0.994               |
| IQ CFT20R               | left isthmus cingulate                     | -0.049 | 0.709   | 0.994               |
| IQ CFT20R               | left lateral occipital                     | 0.205  | 0.116   | 0.994               |
| IQ CFT20R               | left lateral orbitofrontal                 | -0.059 | 0.654   | 0.994               |
| IQ CFT20R               | left lingual                               | -0.002 | 0.989   | 0.994               |
| IQ CFT20R               | left medial orbitofrontal                  | 0.044  | 0.736   | 0.994               |
| IQ CFT20R               | left middle temporal                       | 0.121  | 0.357   | 0.994               |
| IQ CFT20R               | left paracentral                           | -0.086 | 0.515   | 0.994               |
| IQ CFT20R               | left parahippocampal                       | 0.143  | 0.275   | 0.994               |
| IQ CFT20R               | left pars opercularis                      | 0.104  | 0.427   | 0.994               |
| IQ CFT20R               | left pars orbitalis                        | -0.020 | 0.882   | 0.994               |
| IQ CFT20R               | left pars triangularis                     | 0.039  | 0.769   | 0.994               |
| IQ CFT20R               | left pericalcarine                         | -0.098 | 0.457   | 0.994               |
| IQ CFT20R               | left postcentral                           | -0.074 | 0.576   | 0.994               |
| IQ CFT20R               | left posterior cingulate                   | 0.156  | 0.234   | 0.994               |
| IQ CFT20R               | left precentral                            | 0.082  | 0.534   | 0.994               |
| IQ CFT20R               | left precuneus                             | 0.048  | 0.716   | 0.994               |
| IQ CFT20R               | left rostral anterior cingulate            | 0.025  | 0.851   | 0.994               |

|           |                                             |        |       |       |
|-----------|---------------------------------------------|--------|-------|-------|
| IQ CFT20R | left rostral middle frontal                 | -0.139 | 0.288 | 0.994 |
| IQ CFT20R | left superior frontal                       | -0.008 | 0.950 | 0.994 |
| IQ CFT20R | left superior parietal                      | -0.063 | 0.630 | 0.994 |
| IQ CFT20R | left superior temporal                      | 0.141  | 0.284 | 0.994 |
| IQ CFT20R | left supramarginal                          | -0.023 | 0.860 | 0.994 |
| IQ CFT20R | left temporal pole                          | -0.051 | 0.700 | 0.994 |
| IQ CFT20R | left transverse temporal                    | -0.016 | 0.901 | 0.994 |
| IQ CFT20R | right banks of the superior temporal sulcus | 0.005  | 0.968 | 0.994 |
| IQ CFT20R | right caudal anterior cingulate             | 0.103  | 0.434 | 0.994 |
| IQ CFT20R | right caudal middle frontal                 | 0.086  | 0.512 | 0.994 |
| IQ CFT20R | right cuneus                                | 0.017  | 0.899 | 0.994 |
| IQ CFT20R | right entorhinal                            | -0.030 | 0.818 | 0.994 |
| IQ CFT20R | right frontal pole                          | 0.014  | 0.917 | 0.994 |
| IQ CFT20R | right fusiform                              | 0.006  | 0.964 | 0.994 |
| IQ CFT20R | right inferior parietal                     | 0.083  | 0.529 | 0.994 |
| IQ CFT20R | right inferior temporal                     | 0.097  | 0.460 | 0.994 |
| IQ CFT20R | right insula                                | 0.200  | 0.125 | 0.994 |
| IQ CFT20R | right isthmus cingulate                     | -0.026 | 0.842 | 0.994 |
| IQ CFT20R | right lateral occipital                     | -0.001 | 0.994 | 0.994 |
| IQ CFT20R | right lateral orbitofrontal                 | -0.078 | 0.555 | 0.994 |
| IQ CFT20R | right lingual                               | -0.099 | 0.452 | 0.994 |
| IQ CFT20R | right medial orbitofrontal                  | 0.019  | 0.888 | 0.994 |
| IQ CFT20R | right middle temporal                       | 0.048  | 0.714 | 0.994 |
| IQ CFT20R | right paracentral                           | -0.060 | 0.650 | 0.994 |
| IQ CFT20R | right parahippocampal                       | -0.032 | 0.806 | 0.994 |
| IQ CFT20R | right pars opercularis                      | 0.100  | 0.447 | 0.994 |
| IQ CFT20R | right pars orbitalis                        | 0.018  | 0.893 | 0.994 |
| IQ CFT20R | right pars triangularis                     | 0.056  | 0.673 | 0.994 |
| IQ CFT20R | right pericalcarine                         | -0.094 | 0.474 | 0.994 |

|               |                                            |        |       |       |
|---------------|--------------------------------------------|--------|-------|-------|
| IQ CFT20R     | right postcentral                          | -0.079 | 0.550 | 0.994 |
| IQ CFT20R     | right posterior cingulate                  | 0.070  | 0.596 | 0.994 |
| IQ CFT20R     | right precentral                           | 0.046  | 0.727 | 0.994 |
| IQ CFT20R     | right precuneus                            | 0.112  | 0.395 | 0.994 |
| IQ CFT20R     | right rostral anterior cingulate           | 0.021  | 0.873 | 0.994 |
| IQ CFT20R     | right rostral middle frontal               | 0.003  | 0.984 | 0.994 |
| IQ CFT20R     | right superior frontal                     | -0.071 | 0.592 | 0.994 |
| IQ CFT20R     | right superior parietal                    | -0.036 | 0.784 | 0.994 |
| IQ CFT20R     | right superior temporal                    | 0.069  | 0.602 | 0.994 |
| IQ CFT20R     | right supramarginal                        | 0.023  | 0.860 | 0.994 |
| IQ CFT20R     | right temporal pole                        | -0.065 | 0.624 | 0.994 |
| IQ CFT20R     | right transverse temporal                  | -0.109 | 0.406 | 0.994 |
| VLMT Learning | left banks of the superior temporal sulcus | 0.006  | 0.961 | 0.997 |
| VLMT Learning | left caudal anterior cingulate             | 0.047  | 0.704 | 0.997 |
| VLMT Learning | left caudal middle frontal                 | 0.056  | 0.649 | 0.997 |
| VLMT Learning | left cuneus                                | 0.040  | 0.743 | 0.997 |
| VLMT Learning | left entorhinal                            | -0.260 | 0.031 | 0.997 |
| VLMT Learning | left frontal pole                          | -0.123 | 0.315 | 0.997 |
| VLMT Learning | left fusiform                              | -0.094 | 0.441 | 0.997 |
| VLMT Learning | left inferior parietal                     | 0.002  | 0.987 | 0.997 |
| VLMT Learning | left inferior temporal                     | -0.064 | 0.602 | 0.997 |
| VLMT Learning | left insula                                | -0.067 | 0.584 | 0.997 |
| VLMT Learning | left isthmus cingulate                     | 0.090  | 0.461 | 0.997 |
| VLMT Learning | left lateral occipital                     | 0.077  | 0.527 | 0.997 |
| VLMT Learning | left lateral orbitofrontal                 | -0.047 | 0.703 | 0.997 |
| VLMT Learning | left lingual                               | 0.008  | 0.948 | 0.997 |
| VLMT Learning | left medial orbitofrontal                  | 0.096  | 0.431 | 0.997 |
| VLMT Learning | left middle temporal                       | -0.063 | 0.606 | 0.997 |
| VLMT Learning | left paracentral                           | 0.015  | 0.900 | 0.997 |
| VLMT Learning | left parahippocampal                       | -0.055 | 0.656 | 0.997 |



|               |                                             |        |       |       |
|---------------|---------------------------------------------|--------|-------|-------|
| VLMT Learning | left pars opercularis                       | -0.023 | 0.848 | 0.997 |
| VLMT Learning | left pars orbitalis                         | 0.050  | 0.683 | 0.997 |
| VLMT Learning | left pars triangularis                      | -0.046 | 0.709 | 0.997 |
| VLMT Learning | left pericalcarine                          | -0.108 | 0.375 | 0.997 |
| VLMT Learning | left postcentral                            | -0.016 | 0.896 | 0.997 |
| VLMT Learning | left posterior cingulate                    | -0.015 | 0.904 | 0.997 |
| VLMT Learning | left precentral                             | -0.036 | 0.769 | 0.997 |
| VLMT Learning | left precuneus                              | 0.024  | 0.846 | 0.997 |
| VLMT Learning | left rostral anterior cingulate             | -0.017 | 0.887 | 0.997 |
| VLMT Learning | left rostral middle frontal                 | 0.017  | 0.889 | 0.997 |
| VLMT Learning | left superior frontal                       | 0.009  | 0.944 | 0.997 |
| VLMT Learning | left superior parietal                      | -0.085 | 0.489 | 0.997 |
| VLMT Learning | left superior temporal                      | -0.110 | 0.368 | 0.997 |
| VLMT Learning | left supramarginal                          | -0.020 | 0.869 | 0.997 |
| VLMT Learning | left temporal pole                          | 0.023  | 0.848 | 0.997 |
| VLMT Learning | left transverse temporal                    | -0.056 | 0.647 | 0.997 |
| VLMT Learning | right banks of the superior temporal sulcus | -0.000 | 0.997 | 0.997 |
| VLMT Learning | right caudal anterior cingulate             | -0.084 | 0.493 | 0.997 |
| VLMT Learning | right caudal middle frontal                 | 0.074  | 0.548 | 0.997 |
| VLMT Learning | right cuneus                                | 0.086  | 0.481 | 0.997 |
| VLMT Learning | right entorhinal                            | -0.185 | 0.129 | 0.997 |
| VLMT Learning | right frontal pole                          | 0.001  | 0.996 | 0.997 |
| VLMT Learning | right fusiform                              | -0.075 | 0.540 | 0.997 |
| VLMT Learning | right inferior parietal                     | -0.019 | 0.880 | 0.997 |
| VLMT Learning | right inferior temporal                     | -0.059 | 0.630 | 0.997 |
| VLMT Learning | right insula                                | 0.095  | 0.438 | 0.997 |
| VLMT Learning | right isthmus cingulate                     | -0.107 | 0.381 | 0.997 |
| VLMT Learning | right lateral occipital                     | -0.106 | 0.384 | 0.997 |
| VLMT Learning | right lateral orbitofrontal                 | 0.033  | 0.787 | 0.997 |

|                  |                                            |        |       |       |
|------------------|--------------------------------------------|--------|-------|-------|
| VLMT Learning    | right lingual                              | -0.019 | 0.878 | 0.997 |
| VLMT Learning    | right medial orbitofrontal                 | 0.093  | 0.446 | 0.997 |
| VLMT Learning    | right middle temporal                      | 0.007  | 0.956 | 0.997 |
| VLMT Learning    | right paracentral                          | 0.066  | 0.590 | 0.997 |
| VLMT Learning    | right parahippocampal                      | 0.049  | 0.688 | 0.997 |
| VLMT Learning    | right pars opercularis                     | -0.089 | 0.468 | 0.997 |
| VLMT Learning    | right pars orbitalis                       | 0.027  | 0.825 | 0.997 |
| VLMT Learning    | right pars triangularis                    | -0.032 | 0.796 | 0.997 |
| VLMT Learning    | right pericalcarine                        | -0.058 | 0.638 | 0.997 |
| VLMT Learning    | right postcentral                          | -0.126 | 0.304 | 0.997 |
| VLMT Learning    | right posterior cingulate                  | 0.005  | 0.969 | 0.997 |
| VLMT Learning    | right precentral                           | 0.045  | 0.716 | 0.997 |
| VLMT Learning    | right precuneus                            | 0.028  | 0.818 | 0.997 |
| VLMT Learning    | right rostral anterior cingulate           | 0.115  | 0.348 | 0.997 |
| VLMT Learning    | right rostral middle frontal               | 0.033  | 0.790 | 0.997 |
| VLMT Learning    | right superior frontal                     | -0.013 | 0.913 | 0.997 |
| VLMT Learning    | right superior parietal                    | -0.078 | 0.526 | 0.997 |
| VLMT Learning    | right superior temporal                    | -0.154 | 0.206 | 0.997 |
| VLMT Learning    | right supramarginal                        | -0.117 | 0.338 | 0.997 |
| VLMT Learning    | right temporal pole                        | 0.002  | 0.985 | 0.997 |
| VLMT Learning    | right transverse temporal                  | 0.052  | 0.670 | 0.997 |
| VLMT Recognition | left banks of the superior temporal sulcus | -0.151 | 0.214 | 0.924 |
| VLMT Recognition | left caudal anterior cingulate             | -0.162 | 0.182 | 0.924 |
| VLMT Recognition | left caudal middle frontal                 | -0.098 | 0.425 | 0.924 |
| VLMT Recognition | left cuneus                                | 0.023  | 0.850 | 0.924 |
| VLMT Recognition | left entorhinal                            | 0.192  | 0.113 | 0.924 |
| VLMT Recognition | left frontal pole                          | -0.039 | 0.750 | 0.924 |
| VLMT Recognition | left fusiform                              | -0.109 | 0.371 | 0.924 |
| VLMT Recognition | left inferior parietal                     | -0.064 | 0.600 | 0.924 |
| VLMT Recognition | left inferior temporal                     | -0.088 | 0.473 | 0.924 |

|                  |                                             |        |       |       |
|------------------|---------------------------------------------|--------|-------|-------|
| VLMT Recognition | left insula                                 | -0.002 | 0.984 | 0.994 |
| VLMT Recognition | left isthmus cingulate                      | -0.050 | 0.684 | 0.924 |
| VLMT Recognition | left lateral occipital                      | -0.067 | 0.582 | 0.924 |
| VLMT Recognition | left lateral orbitofrontal                  | -0.052 | 0.673 | 0.924 |
| VLMT Recognition | left lingual                                | -0.142 | 0.244 | 0.924 |
| VLMT Recognition | left medial orbitofrontal                   | -0.105 | 0.389 | 0.924 |
| VLMT Recognition | left middle temporal                        | -0.089 | 0.469 | 0.924 |
| VLMT Recognition | left paracentral                            | -0.131 | 0.285 | 0.924 |
| VLMT Recognition | left parahippocampal                        | -0.249 | 0.039 | 0.881 |
| VLMT Recognition | left pars opercularis                       | -0.035 | 0.773 | 0.924 |
| VLMT Recognition | left pars orbitalis                         | -0.086 | 0.481 | 0.924 |
| VLMT Recognition | left pars triangularis                      | -0.060 | 0.626 | 0.924 |
| VLMT Recognition | left pericalcarine                          | -0.152 | 0.212 | 0.924 |
| VLMT Recognition | left postcentral                            | -0.072 | 0.556 | 0.924 |
| VLMT Recognition | left posterior cingulate                    | -0.065 | 0.597 | 0.924 |
| VLMT Recognition | left precentral                             | -0.105 | 0.389 | 0.924 |
| VLMT Recognition | left precuneus                              | -0.094 | 0.444 | 0.924 |
| VLMT Recognition | left rostral anterior cingulate             | -0.121 | 0.323 | 0.924 |
| VLMT Recognition | left rostral middle frontal                 | -0.111 | 0.365 | 0.924 |
| VLMT Recognition | left superior frontal                       | -0.034 | 0.781 | 0.924 |
| VLMT Recognition | left superior parietal                      | -0.035 | 0.778 | 0.924 |
| VLMT Recognition | left superior temporal                      | -0.104 | 0.397 | 0.924 |
| VLMT Recognition | left supramarginal                          | -0.062 | 0.615 | 0.924 |
| VLMT Recognition | left temporal pole                          | -0.178 | 0.143 | 0.924 |
| VLMT Recognition | left transverse temporal                    | -0.087 | 0.476 | 0.924 |
| VLMT Recognition | right banks of the superior temporal sulcus | -0.102 | 0.405 | 0.924 |
| VLMT Recognition | right caudal anterior cingulate             | -0.290 | 0.016 | 0.841 |
| VLMT Recognition | right caudal middle frontal                 | -0.031 | 0.802 | 0.924 |
| VLMT Recognition | right cuneus                                | 0.065  | 0.594 | 0.924 |

|                  |                                  |        |       |       |
|------------------|----------------------------------|--------|-------|-------|
| VLMT Recognition | right entorhinal                 | 0.039  | 0.747 | 0.924 |
| VLMT Recognition | right frontal pole               | -0.020 | 0.870 | 0.924 |
| VLMT Recognition | right fusiform                   | 0.038  | 0.755 | 0.924 |
| VLMT Recognition | right inferior parietal          | -0.106 | 0.388 | 0.924 |
| VLMT Recognition | right inferior temporal          | 0.047  | 0.699 | 0.924 |
| VLMT Recognition | right insula                     | -0.132 | 0.281 | 0.924 |
| VLMT Recognition | right isthmus cingulate          | 0.067  | 0.585 | 0.924 |
| VLMT Recognition | right lateral occipital          | -0.047 | 0.701 | 0.924 |
| VLMT Recognition | right lateral orbitofrontal      | -0.108 | 0.376 | 0.924 |
| VLMT Recognition | right lingual                    | -0.270 | 0.025 | 0.841 |
| VLMT Recognition | right medial orbitofrontal       | -0.198 | 0.102 | 0.924 |
| VLMT Recognition | right middle temporal            | -0.021 | 0.864 | 0.924 |
| VLMT Recognition | right paracentral                | -0.133 | 0.275 | 0.924 |
| VLMT Recognition | right parahippocampal            | -0.114 | 0.349 | 0.924 |
| VLMT Recognition | right pars opercularis           | 0.022  | 0.855 | 0.924 |
| VLMT Recognition | right pars orbitalis             | -0.027 | 0.827 | 0.924 |
| VLMT Recognition | right pars triangularis          | 0.089  | 0.466 | 0.924 |
| VLMT Recognition | right pericalcarine              | -0.090 | 0.464 | 0.924 |
| VLMT Recognition | right postcentral                | -0.001 | 0.994 | 0.994 |
| VLMT Recognition | right posterior cingulate        | -0.099 | 0.416 | 0.924 |
| VLMT Recognition | right precentral                 | -0.063 | 0.606 | 0.924 |
| VLMT Recognition | right precuneus                  | -0.107 | 0.383 | 0.924 |
| VLMT Recognition | right rostral anterior cingulate | -0.022 | 0.856 | 0.924 |
| VLMT Recognition | right rostral middle frontal     | -0.014 | 0.906 | 0.948 |
| VLMT Recognition | right superior frontal           | -0.041 | 0.737 | 0.924 |
| VLMT Recognition | right superior parietal          | 0.006  | 0.963 | 0.993 |
| VLMT Recognition | right superior temporal          | 0.045  | 0.710 | 0.924 |
| VLMT Recognition | right supramarginal              | -0.023 | 0.853 | 0.924 |
| VLMT Recognition | right temporal pole              | -0.140 | 0.252 | 0.924 |
| VLMT Recognition | right transverse temporal        | -0.054 | 0.661 | 0.924 |

|                    |                                            |        |       |       |
|--------------------|--------------------------------------------|--------|-------|-------|
| VLMT Consolidation | left banks of the superior temporal sulcus | -0.073 | 0.554 | 0.996 |
| VLMT Consolidation | left caudal anterior cingulate             | -0.182 | 0.135 | 0.996 |
| VLMT Consolidation | left caudal middle frontal                 | -0.005 | 0.966 | 0.996 |
| VLMT Consolidation | left cuneus                                | 0.047  | 0.701 | 0.996 |
| VLMT Consolidation | left entorhinal                            | 0.059  | 0.629 | 0.996 |
| VLMT Consolidation | left frontal pole                          | 0.016  | 0.899 | 0.996 |
| VLMT Consolidation | left fusiform                              | 0.023  | 0.854 | 0.996 |
| VLMT Consolidation | left inferior parietal                     | -0.107 | 0.381 | 0.996 |
| VLMT Consolidation | left inferior temporal                     | 0.109  | 0.373 | 0.996 |
| VLMT Consolidation | left insula                                | 0.174  | 0.153 | 0.996 |
| VLMT Consolidation | left isthmus cingulate                     | -0.144 | 0.238 | 0.996 |
| VLMT Consolidation | left lateral occipital                     | -0.102 | 0.404 | 0.996 |
| VLMT Consolidation | left lateral orbitofrontal                 | 0.140  | 0.252 | 0.996 |
| VLMT Consolidation | left lingual                               | -0.104 | 0.394 | 0.996 |
| VLMT Consolidation | left medial orbitofrontal                  | -0.098 | 0.424 | 0.996 |
| VLMT Consolidation | left middle temporal                       | 0.068  | 0.581 | 0.996 |
| VLMT Consolidation | left paracentral                           | -0.128 | 0.294 | 0.996 |
| VLMT Consolidation | left parahippocampal                       | -0.177 | 0.145 | 0.996 |
| VLMT Consolidation | left pars opercularis                      | 0.068  | 0.578 | 0.996 |
| VLMT Consolidation | left pars orbitalis                        | 0.034  | 0.783 | 0.996 |
| VLMT Consolidation | left pars triangularis                     | 0.064  | 0.604 | 0.996 |
| VLMT Consolidation | left pericalcarine                         | 0.011  | 0.926 | 0.996 |
| VLMT Consolidation | left postcentral                           | -0.024 | 0.843 | 0.996 |
| VLMT Consolidation | left posterior cingulate                   | -0.019 | 0.878 | 0.996 |
| VLMT Consolidation | left precentral                            | -0.027 | 0.825 | 0.996 |
| VLMT Consolidation | left precuneus                             | -0.019 | 0.875 | 0.996 |
| VLMT Consolidation | left rostral anterior cingulate            | 0.000  | 1.000 | 1.000 |
| VLMT Consolidation | left rostral middle frontal                | 0.040  | 0.744 | 0.996 |
| VLMT Consolidation | left superior frontal                      | -0.010 | 0.938 | 0.996 |
| VLMT Consolidation | left superior parietal                     | -0.065 | 0.596 | 0.996 |

|                    |                                             |        |       |       |
|--------------------|---------------------------------------------|--------|-------|-------|
| VLMT Consolidation | left superior temporal                      | -0.019 | 0.877 | 0.996 |
| VLMT Consolidation | left supramarginal                          | 0.008  | 0.949 | 0.996 |
| VLMT Consolidation | left temporal pole                          | -0.076 | 0.536 | 0.996 |
| VLMT Consolidation | left transverse temporal                    | -0.061 | 0.621 | 0.996 |
| VLMT Consolidation | right banks of the superior temporal sulcus | -0.101 | 0.409 | 0.996 |
| VLMT Consolidation | right caudal anterior cingulate             | -0.202 | 0.096 | 0.996 |
| VLMT Consolidation | right caudal middle frontal                 | -0.009 | 0.942 | 0.996 |
| VLMT Consolidation | right cuneus                                | 0.161  | 0.188 | 0.996 |
| VLMT Consolidation | right entorhinal                            | -0.008 | 0.951 | 0.996 |
| VLMT Consolidation | right frontal pole                          | -0.009 | 0.940 | 0.996 |
| VLMT Consolidation | right fusiform                              | 0.152  | 0.211 | 0.996 |
| VLMT Consolidation | right inferior parietal                     | -0.039 | 0.748 | 0.996 |
| VLMT Consolidation | right inferior temporal                     | 0.205  | 0.091 | 0.996 |
| VLMT Consolidation | right insula                                | -0.072 | 0.555 | 0.996 |
| VLMT Consolidation | right isthmus cingulate                     | -0.031 | 0.798 | 0.996 |
| VLMT Consolidation | right lateral occipital                     | -0.062 | 0.616 | 0.996 |
| VLMT Consolidation | right lateral orbitofrontal                 | 0.005  | 0.967 | 0.996 |
| VLMT Consolidation | right lingual                               | -0.217 | 0.073 | 0.996 |
| VLMT Consolidation | right medial orbitofrontal                  | 0.035  | 0.774 | 0.996 |
| VLMT Consolidation | right middle temporal                       | 0.096  | 0.432 | 0.996 |
| VLMT Consolidation | right paracentral                           | -0.084 | 0.491 | 0.996 |
| VLMT Consolidation | right parahippocampal                       | -0.036 | 0.771 | 0.996 |
| VLMT Consolidation | right pars opercularis                      | 0.062  | 0.614 | 0.996 |
| VLMT Consolidation | right pars orbitalis                        | 0.082  | 0.502 | 0.996 |
| VLMT Consolidation | right pars triangularis                     | 0.174  | 0.152 | 0.996 |
| VLMT Consolidation | right pericalcarine                         | 0.045  | 0.714 | 0.996 |
| VLMT Consolidation | right postcentral                           | 0.013  | 0.914 | 0.996 |
| VLMT Consolidation | right posterior cingulate                   | 0.016  | 0.895 | 0.996 |
| VLMT Consolidation | right precentral                            | 0.038  | 0.755 | 0.996 |

|                           |                                            |        |       |       |
|---------------------------|--------------------------------------------|--------|-------|-------|
| VLMT Consolidation        | right precuneus                            | -0.012 | 0.922 | 0.996 |
| VLMT Consolidation        | right rostral anterior cingulate           | -0.027 | 0.823 | 0.996 |
| VLMT Consolidation        | right rostral middle frontal               | 0.053  | 0.667 | 0.996 |
| VLMT Consolidation        | right superior frontal                     | -0.038 | 0.760 | 0.996 |
| VLMT Consolidation        | right superior parietal                    | 0.000  | 1.000 | 1.000 |
| VLMT Consolidation        | right superior temporal                    | 0.061  | 0.621 | 0.996 |
| VLMT Consolidation        | right supramarginal                        | 0.047  | 0.701 | 0.996 |
| VLMT Consolidation        | right temporal pole                        | -0.025 | 0.838 | 0.996 |
| VLMT Consolidation        | right transverse temporal                  | -0.015 | 0.906 | 0.996 |
| Alertness no warning tone | left banks of the superior temporal sulcus | -0.047 | 0.713 | 0.983 |
| Alertness no warning tone | left caudal anterior cingulate             | 0.199  | 0.115 | 0.983 |
| Alertness no warning tone | left caudal middle frontal                 | 0.040  | 0.755 | 0.983 |
| Alertness no warning tone | left cuneus                                | 0.005  | 0.968 | 0.983 |
| Alertness no warning tone | left entorhinal                            | -0.007 | 0.957 | 0.983 |
| Alertness no warning tone | left frontal pole                          | 0.127  | 0.318 | 0.983 |
| Alertness no warning tone | left fusiform                              | -0.007 | 0.958 | 0.983 |
| Alertness no warning tone | left inferior parietal                     | -0.069 | 0.590 | 0.983 |
| Alertness no warning tone | left inferior temporal                     | 0.102  | 0.422 | 0.983 |
| Alertness no warning tone | left insula                                | 0.104  | 0.413 | 0.983 |
| Alertness no warning tone | left isthmus cingulate                     | 0.025  | 0.843 | 0.983 |
| Alertness no warning tone | left lateral occipital                     | -0.056 | 0.658 | 0.983 |
| Alertness no warning tone | left lateral orbitofrontal                 | 0.069  | 0.589 | 0.983 |
| Alertness no warning tone | left lingual                               | -0.018 | 0.885 | 0.983 |
| Alertness no warning tone | left medial orbitofrontal                  | -0.061 | 0.633 | 0.983 |
| Alertness no warning tone | left middle temporal                       | -0.079 | 0.533 | 0.983 |
| Alertness no warning tone | left paracentral                           | 0.026  | 0.840 | 0.983 |
| Alertness no warning tone | left parahippocampal                       | 0.086  | 0.497 | 0.983 |
| Alertness no warning tone | left pars opercularis                      | 0.202  | 0.110 | 0.983 |
| Alertness no warning tone | left pars orbitalis                        | 0.066  | 0.602 | 0.983 |
| Alertness no warning tone | left pars triangularis                     | 0.147  | 0.245 | 0.983 |

|                           |                                             |        |       |       |
|---------------------------|---------------------------------------------|--------|-------|-------|
| Alertness no warning tone | left pericalcarine                          | -0.129 | 0.311 | 0.983 |
| Alertness no warning tone | left postcentral                            | 0.042  | 0.743 | 0.983 |
| Alertness no warning tone | left posterior cingulate                    | 0.136  | 0.283 | 0.983 |
| Alertness no warning tone | left precentral                             | 0.032  | 0.801 | 0.983 |
| Alertness no warning tone | left precuneus                              | 0.035  | 0.784 | 0.983 |
| Alertness no warning tone | left rostral anterior cingulate             | -0.047 | 0.710 | 0.983 |
| Alertness no warning tone | left rostral middle frontal                 | -0.035 | 0.785 | 0.983 |
| Alertness no warning tone | left superior frontal                       | 0.008  | 0.951 | 0.983 |
| Alertness no warning tone | left superior parietal                      | -0.019 | 0.880 | 0.983 |
| Alertness no warning tone | left superior temporal                      | -0.017 | 0.892 | 0.983 |
| Alertness no warning tone | left supramarginal                          | -0.014 | 0.915 | 0.983 |
| Alertness no warning tone | left temporal pole                          | -0.104 | 0.415 | 0.983 |
| Alertness no warning tone | left transverse temporal                    | 0.063  | 0.619 | 0.983 |
| Alertness no warning tone | right banks of the superior temporal sulcus | 0.155  | 0.222 | 0.983 |
| Alertness no warning tone | right caudal anterior cingulate             | 0.096  | 0.450 | 0.983 |
| Alertness no warning tone | right caudal middle frontal                 | 0.090  | 0.481 | 0.983 |
| Alertness no warning tone | right cuneus                                | -0.148 | 0.242 | 0.983 |
| Alertness no warning tone | right entorhinal                            | -0.057 | 0.657 | 0.983 |
| Alertness no warning tone | right frontal pole                          | 0.128  | 0.314 | 0.983 |
| Alertness no warning tone | right fusiform                              | 0.139  | 0.275 | 0.983 |
| Alertness no warning tone | right inferior parietal                     | -0.008 | 0.947 | 0.983 |
| Alertness no warning tone | right inferior temporal                     | -0.069 | 0.589 | 0.983 |
| Alertness no warning tone | right insula                                | 0.035  | 0.784 | 0.983 |
| Alertness no warning tone | right isthmus cingulate                     | 0.026  | 0.837 | 0.983 |
| Alertness no warning tone | right lateral occipital                     | -0.038 | 0.764 | 0.983 |
| Alertness no warning tone | right lateral orbitofrontal                 | 0.095  | 0.457 | 0.983 |
| Alertness no warning tone | right lingual                               | 0.045  | 0.727 | 0.983 |
| Alertness no warning tone | right medial orbitofrontal                  | 0.037  | 0.770 | 0.983 |
| Alertness no warning tone | right middle temporal                       | 0.014  | 0.910 | 0.983 |



|                           |                                            |        |       |       |
|---------------------------|--------------------------------------------|--------|-------|-------|
| Alertness no warning tone | right paracentral                          | 0.001  | 0.995 | 0.995 |
| Alertness no warning tone | right parahippocampal                      | 0.034  | 0.791 | 0.983 |
| Alertness no warning tone | right pars opercularis                     | 0.039  | 0.760 | 0.983 |
| Alertness no warning tone | right pars orbitalis                       | -0.012 | 0.926 | 0.983 |
| Alertness no warning tone | right pars triangularis                    | 0.125  | 0.323 | 0.983 |
| Alertness no warning tone | right pericalcarine                        | 0.029  | 0.822 | 0.983 |
| Alertness no warning tone | right postcentral                          | -0.058 | 0.652 | 0.983 |
| Alertness no warning tone | right posterior cingulate                  | -0.121 | 0.341 | 0.983 |
| Alertness no warning tone | right precentral                           | -0.030 | 0.814 | 0.983 |
| Alertness no warning tone | right precuneus                            | 0.018  | 0.889 | 0.983 |
| Alertness no warning tone | right rostral anterior cingulate           | 0.026  | 0.840 | 0.983 |
| Alertness no warning tone | right rostral middle frontal               | 0.084  | 0.510 | 0.983 |
| Alertness no warning tone | right superior frontal                     | 0.026  | 0.840 | 0.983 |
| Alertness no warning tone | right superior parietal                    | 0.067  | 0.601 | 0.983 |
| Alertness no warning tone | right superior temporal                    | 0.122  | 0.339 | 0.983 |
| Alertness no warning tone | right supramarginal                        | -0.053 | 0.675 | 0.983 |
| Alertness no warning tone | right temporal pole                        | 0.158  | 0.212 | 0.983 |
| Alertness no warning tone | right transverse temporal                  | 0.095  | 0.453 | 0.983 |
| Alertness warning tone    | left banks of the superior temporal sulcus | -0.095 | 0.455 | 0.987 |
| Alertness warning tone    | left caudal anterior cingulate             | 0.211  | 0.094 | 0.987 |
| Alertness warning tone    | left caudal middle frontal                 | 0.055  | 0.669 | 0.987 |
| Alertness warning tone    | left cuneus                                | -0.038 | 0.768 | 0.987 |
| Alertness warning tone    | left entorhinal                            | 0.135  | 0.287 | 0.987 |
| Alertness warning tone    | left frontal pole                          | 0.103  | 0.418 | 0.987 |
| Alertness warning tone    | left fusiform                              | -0.020 | 0.876 | 0.987 |
| Alertness warning tone    | left inferior parietal                     | -0.074 | 0.560 | 0.987 |
| Alertness warning tone    | left inferior temporal                     | 0.074  | 0.559 | 0.987 |
| Alertness warning tone    | left insula                                | 0.061  | 0.632 | 0.987 |
| Alertness warning tone    | left isthmus cingulate                     | -0.023 | 0.858 | 0.987 |
| Alertness warning tone    | left lateral occipital                     | -0.063 | 0.619 | 0.987 |

|                        |                                             |        |       |       |
|------------------------|---------------------------------------------|--------|-------|-------|
| Alertness warning tone | left lateral orbitofrontal                  | 0.018  | 0.886 | 0.987 |
| Alertness warning tone | left lingual                                | -0.100 | 0.433 | 0.987 |
| Alertness warning tone | left medial orbitofrontal                   | -0.096 | 0.449 | 0.987 |
| Alertness warning tone | left middle temporal                        | -0.119 | 0.349 | 0.987 |
| Alertness warning tone | left paracentral                            | 0.050  | 0.697 | 0.987 |
| Alertness warning tone | left parahippocampal                        | 0.151  | 0.234 | 0.987 |
| Alertness warning tone | left pars opercularis                       | 0.234  | 0.063 | 0.987 |
| Alertness warning tone | left pars orbitalis                         | 0.080  | 0.532 | 0.987 |
| Alertness warning tone | left pars triangularis                      | 0.074  | 0.562 | 0.987 |
| Alertness warning tone | left pericalcarine                          | -0.124 | 0.328 | 0.987 |
| Alertness warning tone | left postcentral                            | 0.046  | 0.718 | 0.987 |
| Alertness warning tone | left posterior cingulate                    | 0.067  | 0.599 | 0.987 |
| Alertness warning tone | left precentral                             | 0.120  | 0.343 | 0.987 |
| Alertness warning tone | left precuneus                              | 0.070  | 0.583 | 0.987 |
| Alertness warning tone | left rostral anterior cingulate             | -0.045 | 0.723 | 0.987 |
| Alertness warning tone | left rostral middle frontal                 | -0.070 | 0.583 | 0.987 |
| Alertness warning tone | left superior frontal                       | 0.046  | 0.716 | 0.987 |
| Alertness warning tone | left superior parietal                      | 0.015  | 0.908 | 0.987 |
| Alertness warning tone | left superior temporal                      | -0.092 | 0.467 | 0.987 |
| Alertness warning tone | left supramarginal                          | -0.018 | 0.887 | 0.987 |
| Alertness warning tone | left temporal pole                          | -0.027 | 0.829 | 0.987 |
| Alertness warning tone | left transverse temporal                    | -0.038 | 0.767 | 0.987 |
| Alertness warning tone | right banks of the superior temporal sulcus | 0.051  | 0.689 | 0.987 |
| Alertness warning tone | right caudal anterior cingulate             | 0.027  | 0.829 | 0.987 |
| Alertness warning tone | right caudal middle frontal                 | 0.133  | 0.296 | 0.987 |
| Alertness warning tone | right cuneus                                | -0.223 | 0.077 | 0.987 |
| Alertness warning tone | right entorhinal                            | 0.006  | 0.964 | 0.987 |
| Alertness warning tone | right frontal pole                          | 0.116  | 0.361 | 0.987 |
| Alertness warning tone | right fusiform                              | 0.023  | 0.855 | 0.987 |

|                        |                                            |        |       |       |
|------------------------|--------------------------------------------|--------|-------|-------|
| Alertness warning tone | right inferior parietal                    | -0.049 | 0.699 | 0.987 |
| Alertness warning tone | right inferior temporal                    | -0.108 | 0.395 | 0.987 |
| Alertness warning tone | right insula                               | -0.076 | 0.550 | 0.987 |
| Alertness warning tone | right isthmus cingulate                    | 0.127  | 0.316 | 0.987 |
| Alertness warning tone | right lateral occipital                    | -0.128 | 0.312 | 0.987 |
| Alertness warning tone | right lateral orbitofrontal                | -0.007 | 0.956 | 0.987 |
| Alertness warning tone | right lingual                              | 0.008  | 0.953 | 0.987 |
| Alertness warning tone | right medial orbitofrontal                 | -0.018 | 0.888 | 0.987 |
| Alertness warning tone | right middle temporal                      | -0.038 | 0.763 | 0.987 |
| Alertness warning tone | right paracentral                          | 0.098  | 0.441 | 0.987 |
| Alertness warning tone | right parahippocampal                      | -0.028 | 0.828 | 0.987 |
| Alertness warning tone | right pars opercularis                     | -0.023 | 0.859 | 0.987 |
| Alertness warning tone | right pars orbitalis                       | -0.018 | 0.889 | 0.987 |
| Alertness warning tone | right pars triangularis                    | 0.062  | 0.624 | 0.987 |
| Alertness warning tone | right pericalcarine                        | 0.002  | 0.986 | 0.987 |
| Alertness warning tone | right postcentral                          | -0.057 | 0.655 | 0.987 |
| Alertness warning tone | right posterior cingulate                  | -0.065 | 0.610 | 0.987 |
| Alertness warning tone | right precentral                           | -0.024 | 0.852 | 0.987 |
| Alertness warning tone | right precuneus                            | 0.032  | 0.801 | 0.987 |
| Alertness warning tone | right rostral anterior cingulate           | -0.002 | 0.987 | 0.987 |
| Alertness warning tone | right rostral middle frontal               | -0.005 | 0.969 | 0.987 |
| Alertness warning tone | right superior frontal                     | 0.038  | 0.764 | 0.987 |
| Alertness warning tone | right superior parietal                    | 0.114  | 0.370 | 0.987 |
| Alertness warning tone | right superior temporal                    | 0.007  | 0.958 | 0.987 |
| Alertness warning tone | right supramarginal                        | -0.056 | 0.661 | 0.987 |
| Alertness warning tone | right temporal pole                        | 0.132  | 0.297 | 0.987 |
| Alertness warning tone | right transverse temporal                  | -0.021 | 0.871 | 0.987 |
| Phasic alertness       | left banks of the superior temporal sulcus | 0.205  | 0.105 | 0.667 |
| Phasic alertness       | left caudal anterior cingulate             | 0.089  | 0.486 | 0.703 |
| Phasic alertness       | left caudal middle frontal                 | 0.045  | 0.725 | 0.865 |

|                  |                                 |        |       |       |
|------------------|---------------------------------|--------|-------|-------|
| Phasic alertness | left cuneus                     | 0.151  | 0.235 | 0.667 |
| Phasic alertness | left entorhinal                 | -0.233 | 0.064 | 0.667 |
| Phasic alertness | left frontal pole               | 0.037  | 0.772 | 0.875 |
| Phasic alertness | left fusiform                   | 0.096  | 0.449 | 0.682 |
| Phasic alertness | left inferior parietal          | 0.066  | 0.605 | 0.839 |
| Phasic alertness | left inferior temporal          | 0.164  | 0.197 | 0.667 |
| Phasic alertness | left insula                     | 0.121  | 0.339 | 0.667 |
| Phasic alertness | left isthmus cingulate          | 0.132  | 0.297 | 0.667 |
| Phasic alertness | left lateral occipital          | 0.037  | 0.771 | 0.875 |
| Phasic alertness | left lateral orbitofrontal      | 0.138  | 0.277 | 0.667 |
| Phasic alertness | left lingual                    | 0.060  | 0.636 | 0.859 |
| Phasic alertness | left medial orbitofrontal       | 0.105  | 0.410 | 0.682 |
| Phasic alertness | left middle temporal            | 0.183  | 0.148 | 0.667 |
| Phasic alertness | left paracentral                | -0.070 | 0.583 | 0.825 |
| Phasic alertness | left parahippocampal            | -0.059 | 0.645 | 0.859 |
| Phasic alertness | left pars opercularis           | 0.096  | 0.451 | 0.682 |
| Phasic alertness | left pars orbitalis             | 0.097  | 0.447 | 0.682 |
| Phasic alertness | left pars triangularis          | 0.167  | 0.186 | 0.667 |
| Phasic alertness | left pericalcarine              | -0.126 | 0.321 | 0.667 |
| Phasic alertness | left postcentral                | -0.031 | 0.810 | 0.903 |
| Phasic alertness | left posterior cingulate        | 0.198  | 0.116 | 0.667 |
| Phasic alertness | left precentral                 | -0.116 | 0.361 | 0.667 |
| Phasic alertness | left precuneus                  | 0.007  | 0.953 | 0.968 |
| Phasic alertness | left rostral anterior cingulate | 0.116  | 0.363 | 0.667 |
| Phasic alertness | left rostral middle frontal     | 0.123  | 0.333 | 0.667 |
| Phasic alertness | left superior frontal           | 0.015  | 0.903 | 0.952 |
| Phasic alertness | left superior parietal          | 0.004  | 0.974 | 0.974 |
| Phasic alertness | left superior temporal          | 0.141  | 0.265 | 0.667 |
| Phasic alertness | left supramarginal              | 0.102  | 0.425 | 0.682 |
| Phasic alertness | left temporal pole              | -0.116 | 0.360 | 0.667 |

|                  |                                             |        |       |       |
|------------------|---------------------------------------------|--------|-------|-------|
| Phasic alertness | left transverse temporal                    | 0.132  | 0.297 | 0.667 |
| Phasic alertness | right banks of the superior temporal sulcus | 0.184  | 0.147 | 0.667 |
| Phasic alertness | right caudal anterior cingulate             | 0.196  | 0.120 | 0.667 |
| Phasic alertness | right caudal middle frontal                 | 0.050  | 0.697 | 0.865 |
| Phasic alertness | right cuneus                                | 0.150  | 0.236 | 0.667 |
| Phasic alertness | right entorhinal                            | -0.110 | 0.389 | 0.678 |
| Phasic alertness | right frontal pole                          | 0.162  | 0.200 | 0.667 |
| Phasic alertness | right fusiform                              | 0.204  | 0.106 | 0.667 |
| Phasic alertness | right inferior parietal                     | 0.104  | 0.413 | 0.682 |
| Phasic alertness | right inferior temporal                     | 0.175  | 0.166 | 0.667 |
| Phasic alertness | right insula                                | 0.173  | 0.172 | 0.667 |
| Phasic alertness | right isthmus cingulate                     | -0.113 | 0.374 | 0.670 |
| Phasic alertness | right lateral occipital                     | 0.093  | 0.463 | 0.684 |
| Phasic alertness | right lateral orbitofrontal                 | 0.286  | 0.022 | 0.667 |
| Phasic alertness | right lingual                               | 0.043  | 0.737 | 0.865 |
| Phasic alertness | right medial orbitofrontal                  | 0.234  | 0.063 | 0.667 |
| Phasic alertness | right middle temporal                       | 0.156  | 0.217 | 0.667 |
| Phasic alertness | right paracentral                           | -0.139 | 0.272 | 0.667 |
| Phasic alertness | right parahippocampal                       | 0.126  | 0.322 | 0.667 |
| Phasic alertness | right pars opercularis                      | 0.157  | 0.215 | 0.667 |
| Phasic alertness | right pars orbitalis                        | 0.138  | 0.275 | 0.667 |
| Phasic alertness | right pars triangularis                     | 0.197  | 0.118 | 0.667 |
| Phasic alertness | right pericalcarine                         | 0.049  | 0.702 | 0.865 |
| Phasic alertness | right postcentral                           | -0.044 | 0.728 | 0.865 |
| Phasic alertness | right posterior cingulate                   | -0.022 | 0.864 | 0.933 |
| Phasic alertness | right precentral                            | -0.024 | 0.850 | 0.932 |
| Phasic alertness | right precuneus                             | 0.050  | 0.695 | 0.865 |
| Phasic alertness | right rostral anterior cingulate            | 0.290  | 0.020 | 0.667 |
| Phasic alertness | right rostral middle frontal                | 0.230  | 0.067 | 0.667 |

|                         |                                            |        |       |       |
|-------------------------|--------------------------------------------|--------|-------|-------|
| Phasic alertness        | right superior frontal                     | 0.052  | 0.682 | 0.865 |
| Phasic alertness        | right superior parietal                    | -0.011 | 0.932 | 0.960 |
| Phasic alertness        | right superior temporal                    | 0.222  | 0.078 | 0.667 |
| Phasic alertness        | right supramarginal                        | -0.014 | 0.910 | 0.952 |
| Phasic alertness        | right temporal pole                        | 0.185  | 0.144 | 0.667 |
| Phasic alertness        | right transverse temporal                  | 0.257  | 0.040 | 0.667 |
| Working memory mistakes | left banks of the superior temporal sulcus | 0.088  | 0.489 | 0.962 |
| Working memory mistakes | left caudal anterior cingulate             | -0.036 | 0.779 | 0.962 |
| Working memory mistakes | left caudal middle frontal                 | 0.033  | 0.797 | 0.962 |
| Working memory mistakes | left cuneus                                | -0.008 | 0.951 | 0.965 |
| Working memory mistakes | left entorhinal                            | 0.087  | 0.494 | 0.962 |
| Working memory mistakes | left frontal pole                          | -0.038 | 0.764 | 0.962 |
| Working memory mistakes | left fusiform                              | 0.064  | 0.615 | 0.962 |
| Working memory mistakes | left inferior parietal                     | 0.025  | 0.845 | 0.962 |
| Working memory mistakes | left inferior temporal                     | 0.147  | 0.246 | 0.962 |
| Working memory mistakes | left insula                                | 0.139  | 0.275 | 0.962 |
| Working memory mistakes | left isthmus cingulate                     | 0.004  | 0.973 | 0.973 |
| Working memory mistakes | left lateral occipital                     | -0.176 | 0.163 | 0.962 |
| Working memory mistakes | left lateral orbitofrontal                 | 0.175  | 0.167 | 0.962 |
| Working memory mistakes | left lingual                               | -0.063 | 0.619 | 0.962 |
| Working memory mistakes | left medial orbitofrontal                  | -0.078 | 0.541 | 0.962 |
| Working memory mistakes | left middle temporal                       | 0.108  | 0.394 | 0.962 |
| Working memory mistakes | left paracentral                           | -0.049 | 0.702 | 0.962 |
| Working memory mistakes | left parahippocampal                       | 0.081  | 0.523 | 0.962 |
| Working memory mistakes | left pars opercularis                      | -0.020 | 0.875 | 0.962 |
| Working memory mistakes | left pars orbitalis                        | -0.061 | 0.632 | 0.962 |
| Working memory mistakes | left pars triangularis                     | -0.116 | 0.362 | 0.962 |
| Working memory mistakes | left pericalcarine                         | 0.037  | 0.772 | 0.962 |
| Working memory mistakes | left postcentral                           | -0.054 | 0.670 | 0.962 |
| Working memory mistakes | left posterior cingulate                   | 0.041  | 0.751 | 0.962 |

|                         |                                             |        |       |       |
|-------------------------|---------------------------------------------|--------|-------|-------|
| Working memory mistakes | left precentral                             | -0.050 | 0.692 | 0.962 |
| Working memory mistakes | left precuneus                              | -0.027 | 0.829 | 0.962 |
| Working memory mistakes | left rostral anterior cingulate             | 0.014  | 0.911 | 0.962 |
| Working memory mistakes | left rostral middle frontal                 | 0.125  | 0.324 | 0.962 |
| Working memory mistakes | left superior frontal                       | -0.012 | 0.923 | 0.962 |
| Working memory mistakes | left superior parietal                      | -0.016 | 0.897 | 0.962 |
| Working memory mistakes | left superior temporal                      | -0.018 | 0.888 | 0.962 |
| Working memory mistakes | left supramarginal                          | -0.012 | 0.927 | 0.962 |
| Working memory mistakes | left temporal pole                          | 0.101  | 0.426 | 0.962 |
| Working memory mistakes | left transverse temporal                    | -0.059 | 0.642 | 0.962 |
| Working memory mistakes | right banks of the superior temporal sulcus | -0.142 | 0.263 | 0.962 |
| Working memory mistakes | right caudal anterior cingulate             | 0.023  | 0.858 | 0.962 |
| Working memory mistakes | right caudal middle frontal                 | 0.057  | 0.654 | 0.962 |
| Working memory mistakes | right cuneus                                | 0.103  | 0.419 | 0.962 |
| Working memory mistakes | right entorhinal                            | 0.037  | 0.773 | 0.962 |
| Working memory mistakes | right frontal pole                          | 0.119  | 0.349 | 0.962 |
| Working memory mistakes | right fusiform                              | -0.051 | 0.687 | 0.962 |
| Working memory mistakes | right inferior parietal                     | -0.030 | 0.811 | 0.962 |
| Working memory mistakes | right inferior temporal                     | 0.123  | 0.335 | 0.962 |
| Working memory mistakes | right insula                                | -0.119 | 0.348 | 0.962 |
| Working memory mistakes | right isthmus cingulate                     | 0.049  | 0.702 | 0.962 |
| Working memory mistakes | right lateral occipital                     | -0.052 | 0.686 | 0.962 |
| Working memory mistakes | right lateral orbitofrontal                 | 0.159  | 0.210 | 0.962 |
| Working memory mistakes | right lingual                               | -0.058 | 0.651 | 0.962 |
| Working memory mistakes | right medial orbitofrontal                  | 0.074  | 0.559 | 0.962 |
| Working memory mistakes | right middle temporal                       | 0.066  | 0.606 | 0.962 |
| Working memory mistakes | right paracentral                           | 0.068  | 0.594 | 0.962 |
| Working memory mistakes | right parahippocampal                       | -0.114 | 0.369 | 0.962 |
| Working memory mistakes | right pars opercularis                      | -0.021 | 0.870 | 0.962 |

|                         |                                            |        |       |       |
|-------------------------|--------------------------------------------|--------|-------|-------|
| Working memory mistakes | right pars orbitalis                       | 0.191  | 0.131 | 0.962 |
| Working memory mistakes | right pars triangularis                    | -0.018 | 0.889 | 0.962 |
| Working memory mistakes | right pericalcarine                        | 0.143  | 0.259 | 0.962 |
| Working memory mistakes | right postcentral                          | -0.092 | 0.468 | 0.962 |
| Working memory mistakes | right posterior cingulate                  | 0.098  | 0.441 | 0.962 |
| Working memory mistakes | right precentral                           | 0.081  | 0.525 | 0.962 |
| Working memory mistakes | right precuneus                            | 0.020  | 0.873 | 0.962 |
| Working memory mistakes | right rostral anterior cingulate           | -0.042 | 0.745 | 0.962 |
| Working memory mistakes | right rostral middle frontal               | 0.055  | 0.669 | 0.962 |
| Working memory mistakes | right superior frontal                     | -0.011 | 0.933 | 0.962 |
| Working memory mistakes | right superior parietal                    | 0.019  | 0.884 | 0.962 |
| Working memory mistakes | right superior temporal                    | 0.031  | 0.809 | 0.962 |
| Working memory mistakes | right supramarginal                        | -0.080 | 0.529 | 0.962 |
| Working memory mistakes | right temporal pole                        | 0.094  | 0.458 | 0.962 |
| Working memory mistakes | right transverse temporal                  | -0.018 | 0.889 | 0.962 |
| Working memory missings | left banks of the superior temporal sulcus | 0.241  | 0.055 | 0.585 |
| Working memory missings | left caudal anterior cingulate             | -0.010 | 0.938 | 0.952 |
| Working memory missings | left caudal middle frontal                 | 0.104  | 0.412 | 0.699 |
| Working memory missings | left cuneus                                | 0.215  | 0.088 | 0.607 |
| Working memory missings | left entorhinal                            | 0.086  | 0.498 | 0.745 |
| Working memory missings | left frontal pole                          | 0.148  | 0.242 | 0.607 |
| Working memory missings | left fusiform                              | 0.135  | 0.286 | 0.607 |
| Working memory missings | left inferior parietal                     | 0.164  | 0.195 | 0.607 |
| Working memory missings | left inferior temporal                     | 0.261  | 0.038 | 0.585 |
| Working memory missings | left insula                                | 0.150  | 0.238 | 0.607 |
| Working memory missings | left isthmus cingulate                     | -0.053 | 0.675 | 0.856 |
| Working memory missings | left lateral occipital                     | -0.146 | 0.249 | 0.607 |
| Working memory missings | left lateral orbitofrontal                 | 0.196  | 0.121 | 0.607 |
| Working memory missings | left lingual                               | 0.016  | 0.898 | 0.939 |
| Working memory missings | left medial orbitofrontal                  | 0.036  | 0.780 | 0.856 |



|                         |                                             |        |       |       |
|-------------------------|---------------------------------------------|--------|-------|-------|
| Working memory missings | left middle temporal                        | 0.253  | 0.044 | 0.585 |
| Working memory missings | left paracentral                            | -0.040 | 0.756 | 0.856 |
| Working memory missings | left parahippocampal                        | -0.147 | 0.248 | 0.607 |
| Working memory missings | left pars opercularis                       | 0.048  | 0.708 | 0.856 |
| Working memory missings | left pars orbitalis                         | 0.085  | 0.504 | 0.745 |
| Working memory missings | left pars triangularis                      | 0.071  | 0.576 | 0.775 |
| Working memory missings | left pericalcarine                          | 0.144  | 0.256 | 0.607 |
| Working memory missings | left postcentral                            | 0.043  | 0.735 | 0.856 |
| Working memory missings | left posterior cingulate                    | 0.064  | 0.616 | 0.806 |
| Working memory missings | left precentral                             | 0.040  | 0.755 | 0.856 |
| Working memory missings | left precuneus                              | 0.221  | 0.079 | 0.607 |
| Working memory missings | left rostral anterior cingulate             | 0.088  | 0.487 | 0.745 |
| Working memory missings | left rostral middle frontal                 | 0.190  | 0.132 | 0.607 |
| Working memory missings | left superior frontal                       | 0.076  | 0.551 | 0.775 |
| Working memory missings | left superior parietal                      | 0.236  | 0.060 | 0.585 |
| Working memory missings | left superior temporal                      | 0.145  | 0.253 | 0.607 |
| Working memory missings | left supramarginal                          | 0.185  | 0.143 | 0.607 |
| Working memory missings | left temporal pole                          | -0.047 | 0.711 | 0.856 |
| Working memory missings | left transverse temporal                    | 0.018  | 0.887 | 0.939 |
| Working memory missings | right banks of the superior temporal sulcus | 0.041  | 0.745 | 0.856 |
| Working memory missings | right caudal anterior cingulate             | 0.070  | 0.582 | 0.775 |
| Working memory missings | right caudal middle frontal                 | 0.108  | 0.395 | 0.699 |
| Working memory missings | right cuneus                                | 0.105  | 0.408 | 0.699 |
| Working memory missings | right entorhinal                            | 0.146  | 0.250 | 0.607 |
| Working memory missings | right frontal pole                          | 0.128  | 0.312 | 0.629 |
| Working memory missings | right fusiform                              | 0.141  | 0.265 | 0.607 |
| Working memory missings | right inferior parietal                     | 0.115  | 0.365 | 0.690 |
| Working memory missings | right inferior temporal                     | 0.239  | 0.057 | 0.585 |
| Working memory missings | right insula                                | -0.017 | 0.895 | 0.939 |

|                         |                                            |        |       |       |
|-------------------------|--------------------------------------------|--------|-------|-------|
| Working memory missings | right isthmus cingulate                    | 0.006  | 0.966 | 0.966 |
| Working memory missings | right lateral occipital                    | 0.147  | 0.247 | 0.607 |
| Working memory missings | right lateral orbitofrontal                | 0.197  | 0.118 | 0.607 |
| Working memory missings | right lingual                              | 0.037  | 0.770 | 0.856 |
| Working memory missings | right medial orbitofrontal                 | 0.152  | 0.230 | 0.607 |
| Working memory missings | right middle temporal                      | 0.247  | 0.049 | 0.585 |
| Working memory missings | right paracentral                          | 0.040  | 0.755 | 0.856 |
| Working memory missings | right parahippocampal                      | -0.139 | 0.274 | 0.607 |
| Working memory missings | right pars opercularis                     | 0.157  | 0.215 | 0.607 |
| Working memory missings | right pars orbitalis                       | 0.268  | 0.032 | 0.585 |
| Working memory missings | right pars triangularis                    | 0.128  | 0.315 | 0.629 |
| Working memory missings | right pericalcarine                        | 0.149  | 0.240 | 0.607 |
| Working memory missings | right postcentral                          | 0.074  | 0.561 | 0.775 |
| Working memory missings | right posterior cingulate                  | 0.137  | 0.281 | 0.607 |
| Working memory missings | right precentral                           | 0.013  | 0.916 | 0.944 |
| Working memory missings | right precuneus                            | 0.168  | 0.184 | 0.607 |
| Working memory missings | right rostral anterior cingulate           | 0.075  | 0.558 | 0.775 |
| Working memory missings | right rostral middle frontal               | 0.099  | 0.434 | 0.703 |
| Working memory missings | right superior frontal                     | 0.090  | 0.480 | 0.745 |
| Working memory missings | right superior parietal                    | 0.185  | 0.143 | 0.607 |
| Working memory missings | right superior temporal                    | 0.148  | 0.244 | 0.607 |
| Working memory missings | right supramarginal                        | 0.121  | 0.339 | 0.659 |
| Working memory missings | right temporal pole                        | 0.102  | 0.421 | 0.699 |
| Working memory missings | right transverse temporal                  | 0.112  | 0.379 | 0.697 |
| Mental flexibility      | left banks of the superior temporal sulcus | 0.013  | 0.918 | 0.983 |
| Mental flexibility      | left caudal anterior cingulate             | -0.084 | 0.511 | 0.856 |
| Mental flexibility      | left caudal middle frontal                 | 0.134  | 0.289 | 0.856 |
| Mental flexibility      | left cuneus                                | 0.102  | 0.421 | 0.856 |
| Mental flexibility      | left entorhinal                            | -0.204 | 0.106 | 0.856 |
| Mental flexibility      | left frontal pole                          | 0.025  | 0.844 | 0.956 |

|                    |                                             |        |       |       |
|--------------------|---------------------------------------------|--------|-------|-------|
| Mental flexibility | left fusiform                               | -0.100 | 0.430 | 0.856 |
| Mental flexibility | left inferior parietal                      | 0.010  | 0.939 | 0.983 |
| Mental flexibility | left inferior temporal                      | 0.060  | 0.636 | 0.883 |
| Mental flexibility | left insula                                 | -0.063 | 0.622 | 0.883 |
| Mental flexibility | left isthmus cingulate                      | 0.146  | 0.250 | 0.856 |
| Mental flexibility | left lateral occipital                      | 0.086  | 0.499 | 0.856 |
| Mental flexibility | left lateral orbitofrontal                  | 0.083  | 0.516 | 0.856 |
| Mental flexibility | left lingual                                | 0.142  | 0.264 | 0.856 |
| Mental flexibility | left medial orbitofrontal                   | 0.130  | 0.306 | 0.856 |
| Mental flexibility | left middle temporal                        | -0.062 | 0.624 | 0.883 |
| Mental flexibility | left paracentral                            | 0.151  | 0.233 | 0.856 |
| Mental flexibility | left parahippocampal                        | -0.110 | 0.388 | 0.856 |
| Mental flexibility | left pars opercularis                       | 0.051  | 0.689 | 0.919 |
| Mental flexibility | left pars orbitalis                         | 0.094  | 0.460 | 0.856 |
| Mental flexibility | left pars triangularis                      | 0.129  | 0.309 | 0.856 |
| Mental flexibility | left pericalcarine                          | -0.004 | 0.977 | 0.992 |
| Mental flexibility | left postcentral                            | 0.117  | 0.358 | 0.856 |
| Mental flexibility | left posterior cingulate                    | -0.040 | 0.751 | 0.922 |
| Mental flexibility | left precentral                             | 0.094  | 0.459 | 0.856 |
| Mental flexibility | left precuneus                              | 0.037  | 0.769 | 0.922 |
| Mental flexibility | left rostral anterior cingulate             | -0.053 | 0.676 | 0.919 |
| Mental flexibility | left rostral middle frontal                 | 0.149  | 0.239 | 0.856 |
| Mental flexibility | left superior frontal                       | 0.126  | 0.322 | 0.856 |
| Mental flexibility | left superior parietal                      | 0.038  | 0.766 | 0.922 |
| Mental flexibility | left superior temporal                      | 0.037  | 0.772 | 0.922 |
| Mental flexibility | left supramarginal                          | 0.001  | 0.992 | 0.992 |
| Mental flexibility | left temporal pole                          | -0.105 | 0.407 | 0.856 |
| Mental flexibility | left transverse temporal                    | -0.028 | 0.827 | 0.954 |
| Mental flexibility | right banks of the superior temporal sulcus | 0.007  | 0.955 | 0.984 |

|                    |                                  |        |       |       |
|--------------------|----------------------------------|--------|-------|-------|
| Mental flexibility | right caudal anterior cingulate  | 0.073  | 0.568 | 0.866 |
| Mental flexibility | right caudal middle frontal      | 0.123  | 0.335 | 0.856 |
| Mental flexibility | right cuneus                     | 0.080  | 0.532 | 0.856 |
| Mental flexibility | right entorhinal                 | -0.098 | 0.441 | 0.856 |
| Mental flexibility | right frontal pole               | 0.062  | 0.626 | 0.883 |
| Mental flexibility | right fusiform                   | -0.029 | 0.821 | 0.954 |
| Mental flexibility | right inferior parietal          | 0.084  | 0.511 | 0.856 |
| Mental flexibility | right inferior temporal          | 0.020  | 0.877 | 0.962 |
| Mental flexibility | right insula                     | 0.148  | 0.243 | 0.856 |
| Mental flexibility | right isthmus cingulate          | 0.110  | 0.385 | 0.856 |
| Mental flexibility | right lateral occipital          | 0.037  | 0.773 | 0.922 |
| Mental flexibility | right lateral orbitofrontal      | 0.182  | 0.150 | 0.856 |
| Mental flexibility | right lingual                    | 0.111  | 0.385 | 0.856 |
| Mental flexibility | right medial orbitofrontal       | 0.010  | 0.940 | 0.983 |
| Mental flexibility | right middle temporal            | 0.101  | 0.429 | 0.856 |
| Mental flexibility | right paracentral                | 0.128  | 0.313 | 0.856 |
| Mental flexibility | right parahippocampal            | -0.145 | 0.252 | 0.856 |
| Mental flexibility | right pars opercularis           | 0.072  | 0.573 | 0.866 |
| Mental flexibility | right pars orbitalis             | 0.080  | 0.528 | 0.856 |
| Mental flexibility | right pars triangularis          | 0.140  | 0.268 | 0.856 |
| Mental flexibility | right pericalcarine              | 0.106  | 0.406 | 0.856 |
| Mental flexibility | right postcentral                | 0.213  | 0.091 | 0.856 |
| Mental flexibility | right posterior cingulate        | 0.022  | 0.863 | 0.962 |
| Mental flexibility | right precentral                 | 0.115  | 0.365 | 0.856 |
| Mental flexibility | right precuneus                  | 0.127  | 0.316 | 0.856 |
| Mental flexibility | right rostral anterior cingulate | -0.092 | 0.469 | 0.856 |
| Mental flexibility | right rostral middle frontal     | 0.189  | 0.135 | 0.856 |
| Mental flexibility | right superior frontal           | 0.144  | 0.255 | 0.856 |
| Mental flexibility | right superior parietal          | 0.131  | 0.304 | 0.856 |
| Mental flexibility | right superior temporal          | 0.078  | 0.542 | 0.856 |

|                            |                                            |        |       |       |
|----------------------------|--------------------------------------------|--------|-------|-------|
| Mental flexibility         | right supramarginal                        | 0.113  | 0.373 | 0.856 |
| Mental flexibility         | right temporal pole                        | 0.045  | 0.723 | 0.922 |
| Mental flexibility         | right transverse temporal                  | 0.164  | 0.194 | 0.856 |
| Divided attention mistakes | left banks of the superior temporal sulcus | -0.004 | 0.975 | 0.975 |
| Divided attention mistakes | left caudal anterior cingulate             | -0.019 | 0.883 | 0.975 |
| Divided attention mistakes | left caudal middle frontal                 | 0.056  | 0.662 | 0.975 |
| Divided attention mistakes | left cuneus                                | -0.060 | 0.640 | 0.975 |
| Divided attention mistakes | left entorhinal                            | 0.129  | 0.310 | 0.975 |
| Divided attention mistakes | left frontal pole                          | -0.074 | 0.560 | 0.975 |
| Divided attention mistakes | left fusiform                              | 0.117  | 0.359 | 0.975 |
| Divided attention mistakes | left inferior parietal                     | -0.037 | 0.774 | 0.975 |
| Divided attention mistakes | left inferior temporal                     | -0.041 | 0.749 | 0.975 |
| Divided attention mistakes | left insula                                | 0.035  | 0.782 | 0.975 |
| Divided attention mistakes | left isthmus cingulate                     | -0.094 | 0.459 | 0.975 |
| Divided attention mistakes | left lateral occipital                     | -0.087 | 0.494 | 0.975 |
| Divided attention mistakes | left lateral orbitofrontal                 | 0.090  | 0.479 | 0.975 |
| Divided attention mistakes | left lingual                               | -0.020 | 0.877 | 0.975 |
| Divided attention mistakes | left medial orbitofrontal                  | -0.317 | 0.011 | 0.555 |
| Divided attention mistakes | left middle temporal                       | 0.029  | 0.820 | 0.975 |
| Divided attention mistakes | left paracentral                           | 0.028  | 0.824 | 0.975 |
| Divided attention mistakes | left parahippocampal                       | 0.065  | 0.608 | 0.975 |
| Divided attention mistakes | left pars opercularis                      | -0.009 | 0.941 | 0.975 |
| Divided attention mistakes | left pars orbitalis                        | 0.027  | 0.830 | 0.975 |
| Divided attention mistakes | left pars triangularis                     | -0.042 | 0.743 | 0.975 |
| Divided attention mistakes | left pericalcarine                         | 0.045  | 0.727 | 0.975 |
| Divided attention mistakes | left postcentral                           | 0.034  | 0.787 | 0.975 |
| Divided attention mistakes | left posterior cingulate                   | -0.031 | 0.807 | 0.975 |
| Divided attention mistakes | left precentral                            | -0.012 | 0.927 | 0.975 |
| Divided attention mistakes | left precuneus                             | -0.036 | 0.780 | 0.975 |
| Divided attention mistakes | left rostral anterior cingulate            | -0.062 | 0.626 | 0.975 |

|                            |                                             |        |       |       |
|----------------------------|---------------------------------------------|--------|-------|-------|
| Divided attention mistakes | left rostral middle frontal                 | 0.110  | 0.385 | 0.975 |
| Divided attention mistakes | left superior frontal                       | 0.018  | 0.886 | 0.975 |
| Divided attention mistakes | left superior parietal                      | -0.030 | 0.812 | 0.975 |
| Divided attention mistakes | left superior temporal                      | 0.015  | 0.908 | 0.975 |
| Divided attention mistakes | left supramarginal                          | -0.064 | 0.617 | 0.975 |
| Divided attention mistakes | left temporal pole                          | -0.041 | 0.750 | 0.975 |
| Divided attention mistakes | left transverse temporal                    | 0.113  | 0.376 | 0.975 |
| Divided attention mistakes | right banks of the superior temporal sulcus | -0.127 | 0.316 | 0.975 |
| Divided attention mistakes | right caudal anterior cingulate             | -0.047 | 0.714 | 0.975 |
| Divided attention mistakes | right caudal middle frontal                 | 0.106  | 0.407 | 0.975 |
| Divided attention mistakes | right cuneus                                | 0.040  | 0.751 | 0.975 |
| Divided attention mistakes | right entorhinal                            | -0.299 | 0.016 | 0.555 |
| Divided attention mistakes | right frontal pole                          | 0.187  | 0.138 | 0.975 |
| Divided attention mistakes | right fusiform                              | -0.125 | 0.325 | 0.975 |
| Divided attention mistakes | right inferior parietal                     | -0.119 | 0.347 | 0.975 |
| Divided attention mistakes | right inferior temporal                     | -0.044 | 0.732 | 0.975 |
| Divided attention mistakes | right insula                                | -0.042 | 0.741 | 0.975 |
| Divided attention mistakes | right isthmus cingulate                     | 0.060  | 0.637 | 0.975 |
| Divided attention mistakes | right lateral occipital                     | -0.070 | 0.581 | 0.975 |
| Divided attention mistakes | right lateral orbitofrontal                 | 0.065  | 0.612 | 0.975 |
| Divided attention mistakes | right lingual                               | -0.019 | 0.880 | 0.975 |
| Divided attention mistakes | right medial orbitofrontal                  | 0.054  | 0.670 | 0.975 |
| Divided attention mistakes | right middle temporal                       | 0.004  | 0.974 | 0.975 |
| Divided attention mistakes | right paracentral                           | 0.112  | 0.377 | 0.975 |
| Divided attention mistakes | right parahippocampal                       | -0.029 | 0.818 | 0.975 |
| Divided attention mistakes | right pars opercularis                      | -0.033 | 0.795 | 0.975 |
| Divided attention mistakes | right pars orbitalis                        | 0.087  | 0.492 | 0.975 |
| Divided attention mistakes | right pars triangularis                     | 0.138  | 0.278 | 0.975 |
| Divided attention mistakes | right pericalcarine                         | 0.055  | 0.663 | 0.975 |

|                            |                                            |        |       |       |
|----------------------------|--------------------------------------------|--------|-------|-------|
| Divided attention mistakes | right postcentral                          | -0.107 | 0.400 | 0.975 |
| Divided attention mistakes | right posterior cingulate                  | -0.112 | 0.378 | 0.975 |
| Divided attention mistakes | right precentral                           | 0.010  | 0.935 | 0.975 |
| Divided attention mistakes | right precuneus                            | -0.077 | 0.547 | 0.975 |
| Divided attention mistakes | right rostral anterior cingulate           | -0.020 | 0.878 | 0.975 |
| Divided attention mistakes | right rostral middle frontal               | 0.125  | 0.325 | 0.975 |
| Divided attention mistakes | right superior frontal                     | 0.038  | 0.765 | 0.975 |
| Divided attention mistakes | right superior parietal                    | -0.096 | 0.450 | 0.975 |
| Divided attention mistakes | right superior temporal                    | 0.046  | 0.718 | 0.975 |
| Divided attention mistakes | right supramarginal                        | -0.140 | 0.271 | 0.975 |
| Divided attention mistakes | right temporal pole                        | 0.144  | 0.257 | 0.975 |
| Divided attention mistakes | right transverse temporal                  | 0.008  | 0.948 | 0.975 |
| Divided attention missings | left banks of the superior temporal sulcus | -0.075 | 0.554 | 0.738 |
| Divided attention missings | left caudal anterior cingulate             | -0.271 | 0.030 | 0.512 |
| Divided attention missings | left caudal middle frontal                 | -0.096 | 0.450 | 0.712 |
| Divided attention missings | left cuneus                                | -0.096 | 0.449 | 0.712 |
| Divided attention missings | left entorhinal                            | 0.027  | 0.834 | 0.901 |
| Divided attention missings | left frontal pole                          | -0.011 | 0.929 | 0.929 |
| Divided attention missings | left fusiform                              | -0.138 | 0.276 | 0.695 |
| Divided attention missings | left inferior parietal                     | -0.111 | 0.382 | 0.695 |
| Divided attention missings | left inferior temporal                     | -0.183 | 0.147 | 0.592 |
| Divided attention missings | left insula                                | -0.156 | 0.220 | 0.598 |
| Divided attention missings | left isthmus cingulate                     | -0.162 | 0.200 | 0.592 |
| Divided attention missings | left lateral occipital                     | -0.030 | 0.814 | 0.892 |
| Divided attention missings | left lateral orbitofrontal                 | -0.020 | 0.875 | 0.919 |
| Divided attention missings | left lingual                               | -0.014 | 0.914 | 0.927 |
| Divided attention missings | left medial orbitofrontal                  | -0.339 | 0.006 | 0.209 |
| Divided attention missings | left middle temporal                       | -0.177 | 0.162 | 0.592 |
| Divided attention missings | left paracentral                           | -0.044 | 0.727 | 0.838 |
| Divided attention missings | left parahippocampal                       | -0.088 | 0.487 | 0.735 |

|                            |                                             |        |       |       |
|----------------------------|---------------------------------------------|--------|-------|-------|
| Divided attention missings | left pars opercularis                       | -0.196 | 0.121 | 0.592 |
| Divided attention missings | left pars orbitalis                         | -0.209 | 0.097 | 0.589 |
| Divided attention missings | left pars triangularis                      | -0.224 | 0.075 | 0.572 |
| Divided attention missings | left pericalcarine                          | 0.045  | 0.725 | 0.838 |
| Divided attention missings | left postcentral                            | -0.106 | 0.405 | 0.695 |
| Divided attention missings | left posterior cingulate                    | -0.159 | 0.210 | 0.594 |
| Divided attention missings | left precentral                             | -0.241 | 0.055 | 0.572 |
| Divided attention missings | left precuneus                              | -0.116 | 0.363 | 0.695 |
| Divided attention missings | left rostral anterior cingulate             | -0.289 | 0.021 | 0.469 |
| Divided attention missings | left rostral middle frontal                 | -0.065 | 0.608 | 0.760 |
| Divided attention missings | left superior frontal                       | -0.165 | 0.193 | 0.592 |
| Divided attention missings | left superior parietal                      | -0.113 | 0.375 | 0.695 |
| Divided attention missings | left superior temporal                      | -0.168 | 0.185 | 0.592 |
| Divided attention missings | left supramarginal                          | -0.147 | 0.248 | 0.649 |
| Divided attention missings | left temporal pole                          | -0.078 | 0.538 | 0.735 |
| Divided attention missings | left transverse temporal                    | -0.108 | 0.395 | 0.695 |
| Divided attention missings | right banks of the superior temporal sulcus | -0.205 | 0.104 | 0.589 |
| Divided attention missings | right caudal anterior cingulate             | -0.351 | 0.005 | 0.209 |
| Divided attention missings | right caudal middle frontal                 | -0.111 | 0.384 | 0.695 |
| Divided attention missings | right cuneus                                | -0.064 | 0.615 | 0.760 |
| Divided attention missings | right entorhinal                            | -0.078 | 0.539 | 0.735 |
| Divided attention missings | right frontal pole                          | -0.020 | 0.878 | 0.919 |
| Divided attention missings | right fusiform                              | -0.082 | 0.519 | 0.735 |
| Divided attention missings | right inferior parietal                     | -0.119 | 0.350 | 0.695 |
| Divided attention missings | right inferior temporal                     | -0.117 | 0.358 | 0.695 |
| Divided attention missings | right insula                                | -0.182 | 0.150 | 0.592 |
| Divided attention missings | right isthmus cingulate                     | -0.065 | 0.609 | 0.760 |
| Divided attention missings | right lateral occipital                     | 0.015  | 0.906 | 0.927 |
| Divided attention missings | right lateral orbitofrontal                 | -0.078 | 0.540 | 0.735 |



|                            |                                  |        |       |       |
|----------------------------|----------------------------------|--------|-------|-------|
| Divided attention missings | right lingual                    | -0.105 | 0.409 | 0.695 |
| Divided attention missings | right medial orbitofrontal       | -0.224 | 0.076 | 0.572 |
| Divided attention missings | right middle temporal            | -0.058 | 0.648 | 0.787 |
| Divided attention missings | right paracentral                | -0.033 | 0.793 | 0.884 |
| Divided attention missings | right parahippocampal            | 0.114  | 0.371 | 0.695 |
| Divided attention missings | right pars opercularis           | -0.163 | 0.197 | 0.592 |
| Divided attention missings | right pars orbitalis             | -0.179 | 0.158 | 0.592 |
| Divided attention missings | right pars triangularis          | -0.089 | 0.483 | 0.735 |
| Divided attention missings | right pericalcarine              | -0.037 | 0.774 | 0.877 |
| Divided attention missings | right postcentral                | -0.167 | 0.186 | 0.592 |
| Divided attention missings | right posterior cingulate        | -0.164 | 0.196 | 0.592 |
| Divided attention missings | right precentral                 | -0.102 | 0.423 | 0.702 |
| Divided attention missings | right precuneus                  | -0.212 | 0.093 | 0.589 |
| Divided attention missings | right rostral anterior cingulate | -0.250 | 0.046 | 0.572 |
| Divided attention missings | right rostral middle frontal     | -0.119 | 0.348 | 0.695 |
| Divided attention missings | right superior frontal           | -0.115 | 0.364 | 0.695 |
| Divided attention missings | right superior parietal          | -0.127 | 0.317 | 0.695 |
| Divided attention missings | right superior temporal          | -0.065 | 0.610 | 0.760 |
| Divided attention missings | right supramarginal              | -0.227 | 0.071 | 0.572 |
| Divided attention missings | right temporal pole              | 0.047  | 0.709 | 0.838 |
| Divided attention missings | right transverse temporal        | -0.086 | 0.502 | 0.735 |

**Supplementary Table S9.** Correlations of neuropsychological findings and cortical thickness of patients with borderline personality disorder. Abbreviations: *CFT-20 R*, *Culture Fair Intelligence Test*; *IQ*, *intelligence quotient*; *MWT-B*, *Multiple-choice Word Test*; *TIV*, *total intracranial volume*; *VLMT*, *Verbal Learning and Memory Test*.

| Neuropsychological Test | Brain Region            | r      | p-value | Adjusted p-value |
|-------------------------|-------------------------|--------|---------|------------------|
| IQ CFT20R               | Left Lateral Ventricle  | -0.195 | 0.135   | 0.729            |
| IQ CFT20R               | Left Thalamus           | 0.066  | 0.618   | 0.824            |
| IQ CFT20R               | Left Caudate            | -0.003 | 0.983   | 0.983            |
| IQ CFT20R               | Left Putamen            | -0.124 | 0.345   | 0.729            |
| IQ CFT20R               | Left Pallidum           | -0.136 | 0.302   | 0.729            |
| IQ CFT20R               | Left Hippocampus        | 0.266  | 0.040   | 0.634            |
| IQ CFT20R               | Left Amygdala           | 0.006  | 0.967   | 0.983            |
| IQ CFT20R               | Left Accumbens area     | 0.053  | 0.689   | 0.848            |
| IQ CFT20R               | Right Lateral Ventricle | -0.119 | 0.365   | 0.729            |
| IQ CFT20R               | Right Thalamus          | -0.131 | 0.318   | 0.729            |
| IQ CFT20R               | Right Caudate           | -0.067 | 0.611   | 0.824            |
| IQ CFT20R               | Right Putamen           | -0.106 | 0.422   | 0.750            |
| IQ CFT20R               | Right Pallidum          | -0.147 | 0.263   | 0.729            |
| IQ CFT20R               | Right Hippocampus       | 0.153  | 0.245   | 0.729            |
| IQ CFT20R               | Right Amygdala          | -0.081 | 0.538   | 0.824            |
| IQ CFT20R               | Right Accumbens area    | -0.034 | 0.796   | 0.909            |
| VLMT Learning           | Left Lateral Ventricle  | -0.055 | 0.651   | 0.875            |
| VLMT Learning           | Left Thalamus           | 0.114  | 0.350   | 0.676            |
| VLMT Learning           | Left Caudate            | -0.190 | 0.117   | 0.676            |
| VLMT Learning           | Left Putamen            | -0.135 | 0.269   | 0.676            |
| VLMT Learning           | Left Pallidum           | -0.099 | 0.417   | 0.676            |
| VLMT Learning           | Left Hippocampus        | -0.111 | 0.365   | 0.676            |
| VLMT Learning           | Left Amygdala           | -0.050 | 0.683   | 0.875            |
| VLMT Learning           | Left Accumbens area     | -0.221 | 0.068   | 0.676            |
| VLMT Learning           | Right Lateral Ventricle | -0.040 | 0.747   | 0.875            |
| VLMT Learning           | Right Thalamus          | 0.029  | 0.811   | 0.875            |
| VLMT Learning           | Right Caudate           | -0.162 | 0.182   | 0.676            |
| VLMT Learning           | Right Putamen           | -0.125 | 0.308   | 0.676            |

|                    |                         |        |       |       |
|--------------------|-------------------------|--------|-------|-------|
| VLMT Learning      | Right Pallidum          | -0.013 | 0.914 | 0.914 |
| VLMT Learning      | Right Hippocampus       | -0.101 | 0.408 | 0.676 |
| VLMT Learning      | Right Amygdala          | -0.098 | 0.422 | 0.676 |
| VLMT Learning      | Right Accumbens area    | -0.028 | 0.821 | 0.875 |
| VLMT Recognition   | Left Lateral Ventricle  | -0.199 | 0.100 | 0.803 |
| VLMT Recognition   | Left Thalamus           | -0.005 | 0.966 | 0.966 |
| VLMT Recognition   | Left Caudate            | 0.039  | 0.753 | 0.966 |
| VLMT Recognition   | Left Putamen            | 0.147  | 0.227 | 0.966 |
| VLMT Recognition   | Left Pallidum           | 0.086  | 0.483 | 0.966 |
| VLMT Recognition   | Left Hippocampus        | 0.015  | 0.902 | 0.966 |
| VLMT Recognition   | Left Amygdala           | -0.042 | 0.734 | 0.966 |
| VLMT Recognition   | Left Accumbens area     | -0.049 | 0.692 | 0.966 |
| VLMT Recognition   | Right Lateral Ventricle | -0.279 | 0.020 | 0.322 |
| VLMT Recognition   | Right Thalamus          | -0.030 | 0.804 | 0.966 |
| VLMT Recognition   | Right Caudate           | 0.016  | 0.897 | 0.966 |
| VLMT Recognition   | Right Putamen           | 0.121  | 0.321 | 0.966 |
| VLMT Recognition   | Right Pallidum          | 0.007  | 0.956 | 0.966 |
| VLMT Recognition   | Right Hippocampus       | -0.010 | 0.933 | 0.966 |
| VLMT Recognition   | Right Amygdala          | -0.118 | 0.333 | 0.966 |
| VLMT Recognition   | Right Accumbens area    | -0.072 | 0.555 | 0.966 |
| VLMT Consolidation | Left Lateral Ventricle  | 0.016  | 0.899 | 0.915 |
| VLMT Consolidation | Left Thalamus           | -0.223 | 0.065 | 0.825 |
| VLMT Consolidation | Left Caudate            | -0.073 | 0.551 | 0.882 |
| VLMT Consolidation | Left Putamen            | 0.049  | 0.689 | 0.915 |
| VLMT Consolidation | Left Pallidum           | 0.143  | 0.240 | 0.825 |
| VLMT Consolidation | Left Hippocampus        | -0.106 | 0.385 | 0.825 |
| VLMT Consolidation | Left Amygdala           | -0.013 | 0.915 | 0.915 |
| VLMT Consolidation | Left Accumbens area     | -0.126 | 0.302 | 0.825 |
| VLMT Consolidation | Right Lateral Ventricle | -0.045 | 0.715 | 0.915 |
| VLMT Consolidation | Right Thalamus          | -0.098 | 0.425 | 0.825 |

|                           |                         |        |       |       |
|---------------------------|-------------------------|--------|-------|-------|
| VLMT Consolidation        | Right Caudate           | -0.034 | 0.781 | 0.915 |
| VLMT Consolidation        | Right Putamen           | 0.018  | 0.883 | 0.915 |
| VLMT Consolidation        | Right Pallidum          | 0.090  | 0.464 | 0.825 |
| VLMT Consolidation        | Right Hippocampus       | -0.164 | 0.177 | 0.825 |
| VLMT Consolidation        | Right Amygdala          | -0.130 | 0.287 | 0.825 |
| VLMT Consolidation        | Right Accumbens area    | -0.113 | 0.355 | 0.825 |
| Alertness no warning tone | Left Lateral Ventricle  | -0.061 | 0.634 | 0.822 |
| Alertness no warning tone | Left Thalamus           | -0.013 | 0.916 | 0.916 |
| Alertness no warning tone | Left Caudate            | 0.077  | 0.548 | 0.822 |
| Alertness no warning tone | Left Putamen            | 0.158  | 0.212 | 0.822 |
| Alertness no warning tone | Left Pallidum           | -0.058 | 0.649 | 0.822 |
| Alertness no warning tone | Left Hippocampus        | -0.091 | 0.473 | 0.822 |
| Alertness no warning tone | Left Amygdala           | 0.019  | 0.879 | 0.916 |
| Alertness no warning tone | Left Accumbens area     | 0.161  | 0.203 | 0.822 |
| Alertness no warning tone | Right Lateral Ventricle | 0.096  | 0.449 | 0.822 |
| Alertness no warning tone | Right Thalamus          | -0.088 | 0.488 | 0.822 |
| Alertness no warning tone | Right Caudate           | 0.090  | 0.478 | 0.822 |
| Alertness no warning tone | Right Putamen           | 0.204  | 0.106 | 0.822 |
| Alertness no warning tone | Right Pallidum          | 0.080  | 0.532 | 0.822 |
| Alertness no warning tone | Right Hippocampus       | -0.033 | 0.795 | 0.909 |
| Alertness no warning tone | Right Amygdala          | 0.055  | 0.668 | 0.822 |
| Alertness no warning tone | Right Accumbens area    | 0.139  | 0.273 | 0.822 |
| Alertness warning tone    | Left Lateral Ventricle  | -0.035 | 0.783 | 0.940 |
| Alertness warning tone    | Left Thalamus           | 0.082  | 0.521 | 0.940 |
| Alertness warning tone    | Left Caudate            | 0.070  | 0.585 | 0.940 |
| Alertness warning tone    | Left Putamen            | 0.159  | 0.210 | 0.841 |
| Alertness warning tone    | Left Pallidum           | -0.033 | 0.798 | 0.940 |
| Alertness warning tone    | Left Hippocampus        | -0.025 | 0.843 | 0.940 |
| Alertness warning tone    | Left Amygdala           | -0.044 | 0.728 | 0.940 |
| Alertness warning tone    | Left Accumbens area     | 0.162  | 0.201 | 0.841 |

|                         |                         |        |       |       |
|-------------------------|-------------------------|--------|-------|-------|
| Alertness warning tone  | Right Lateral Ventricle | 0.116  | 0.361 | 0.940 |
| Alertness warning tone  | Right Thalamus          | -0.019 | 0.881 | 0.940 |
| Alertness warning tone  | Right Caudate           | 0.074  | 0.562 | 0.940 |
| Alertness warning tone  | Right Putamen           | 0.188  | 0.136 | 0.841 |
| Alertness warning tone  | Right Pallidum          | 0.040  | 0.751 | 0.940 |
| Alertness warning tone  | Right Hippocampus       | -0.032 | 0.804 | 0.940 |
| Alertness warning tone  | Right Amygdala          | 0.001  | 0.991 | 0.991 |
| Alertness warning tone  | Right Accumbens area    | 0.176  | 0.165 | 0.841 |
| Phasic alertness        | Left Lateral Ventricle  | -0.053 | 0.679 | 0.776 |
| Phasic alertness        | Left Thalamus           | -0.165 | 0.191 | 0.624 |
| Phasic alertness        | Left Caudate            | 0.090  | 0.478 | 0.696 |
| Phasic alertness        | Left Putamen            | 0.120  | 0.344 | 0.624 |
| Phasic alertness        | Left Pallidum           | 0.033  | 0.797 | 0.818 |
| Phasic alertness        | Left Hippocampus        | -0.162 | 0.200 | 0.624 |
| Phasic alertness        | Left Amygdala           | 0.125  | 0.325 | 0.624 |
| Phasic alertness        | Left Accumbens area     | 0.109  | 0.390 | 0.624 |
| Phasic alertness        | Right Lateral Ventricle | -0.057 | 0.652 | 0.776 |
| Phasic alertness        | Right Thalamus          | -0.155 | 0.222 | 0.624 |
| Phasic alertness        | Right Caudate           | 0.111  | 0.382 | 0.624 |
| Phasic alertness        | Right Putamen           | 0.161  | 0.204 | 0.624 |
| Phasic alertness        | Right Pallidum          | 0.154  | 0.224 | 0.624 |
| Phasic alertness        | Right Hippocampus       | -0.029 | 0.818 | 0.818 |
| Phasic alertness        | Right Amygdala          | 0.077  | 0.546 | 0.728 |
| Phasic alertness        | Right Accumbens area    | 0.111  | 0.384 | 0.624 |
| Working memory mistakes | Left Lateral Ventricle  | 0.009  | 0.944 | 0.992 |
| Working memory mistakes | Left Thalamus           | 0.027  | 0.832 | 0.992 |
| Working memory mistakes | Left Caudate            | -0.073 | 0.568 | 0.992 |
| Working memory mistakes | Left Putamen            | 0.147  | 0.247 | 0.992 |
| Working memory mistakes | Left Pallidum           | 0.096  | 0.449 | 0.992 |
| Working memory mistakes | Left Hippocampus        | 0.001  | 0.992 | 0.992 |

|                         |                         |        |       |       |
|-------------------------|-------------------------|--------|-------|-------|
| Working memory mistakes | Left Amygdala           | -0.098 | 0.440 | 0.992 |
| Working memory mistakes | Left Accumbens area     | -0.067 | 0.601 | 0.992 |
| Working memory mistakes | Right Lateral Ventricle | 0.085  | 0.505 | 0.992 |
| Working memory mistakes | Right Thalamus          | 0.003  | 0.979 | 0.992 |
| Working memory mistakes | Right Caudate           | -0.024 | 0.850 | 0.992 |
| Working memory mistakes | Right Putamen           | 0.172  | 0.175 | 0.992 |
| Working memory mistakes | Right Pallidum          | 0.128  | 0.314 | 0.992 |
| Working memory mistakes | Right Hippocampus       | -0.091 | 0.475 | 0.992 |
| Working memory mistakes | Right Amygdala          | -0.061 | 0.631 | 0.992 |
| Working memory mistakes | Right Accumbens area    | 0.037  | 0.773 | 0.992 |
| Working memory missings | Left Lateral Ventricle  | 0.082  | 0.519 | 0.754 |
| Working memory missings | Left Thalamus           | 0.003  | 0.981 | 0.981 |
| Working memory missings | Left Caudate            | 0.067  | 0.597 | 0.796 |
| Working memory missings | Left Putamen            | 0.164  | 0.194 | 0.702 |
| Working memory missings | Left Pallidum           | 0.264  | 0.035 | 0.445 |
| Working memory missings | Left Hippocampus        | -0.126 | 0.321 | 0.702 |
| Working memory missings | Left Amygdala           | 0.108  | 0.395 | 0.702 |
| Working memory missings | Left Accumbens area     | -0.046 | 0.717 | 0.864 |
| Working memory missings | Right Lateral Ventricle | 0.005  | 0.972 | 0.981 |
| Working memory missings | Right Thalamus          | 0.187  | 0.140 | 0.702 |
| Working memory missings | Right Caudate           | 0.117  | 0.358 | 0.702 |
| Working memory missings | Right Putamen           | 0.124  | 0.329 | 0.702 |
| Working memory missings | Right Pallidum          | 0.240  | 0.056 | 0.445 |
| Working memory missings | Right Hippocampus       | -0.120 | 0.346 | 0.702 |
| Working memory missings | Right Amygdala          | 0.088  | 0.487 | 0.754 |
| Working memory missings | Right Accumbens area    | -0.040 | 0.756 | 0.864 |
| Mental flexibility      | Left Lateral Ventricle  | 0.005  | 0.971 | 0.971 |
| Mental flexibility      | Left Thalamus           | 0.103  | 0.417 | 0.961 |
| Mental flexibility      | Left Caudate            | 0.095  | 0.455 | 0.961 |
| Mental flexibility      | Left Putamen            | 0.082  | 0.520 | 0.961 |

|                            |                         |        |       |       |
|----------------------------|-------------------------|--------|-------|-------|
| Mental flexibility         | Left Pallidum           | 0.109  | 0.393 | 0.961 |
| Mental flexibility         | Left Hippocampus        | 0.156  | 0.219 | 0.961 |
| Mental flexibility         | Left Amygdala           | 0.041  | 0.748 | 0.961 |
| Mental flexibility         | Left Accumbens area     | -0.035 | 0.782 | 0.961 |
| Mental flexibility         | Right Lateral Ventricle | -0.066 | 0.605 | 0.961 |
| Mental flexibility         | Right Thalamus          | 0.151  | 0.234 | 0.961 |
| Mental flexibility         | Right Caudate           | 0.032  | 0.803 | 0.961 |
| Mental flexibility         | Right Putamen           | 0.012  | 0.926 | 0.971 |
| Mental flexibility         | Right Pallidum          | 0.068  | 0.594 | 0.961 |
| Mental flexibility         | Right Hippocampus       | 0.091  | 0.477 | 0.961 |
| Mental flexibility         | Right Amygdala          | -0.026 | 0.836 | 0.961 |
| Mental flexibility         | Right Accumbens area    | -0.026 | 0.841 | 0.961 |
| Divided attention mistakes | Left Lateral Ventricle  | -0.090 | 0.479 | 0.892 |
| Divided attention mistakes | Left Thalamus           | 0.187  | 0.138 | 0.554 |
| Divided attention mistakes | Left Caudate            | -0.170 | 0.179 | 0.573 |
| Divided attention mistakes | Left Putamen            | -0.229 | 0.069 | 0.544 |
| Divided attention mistakes | Left Pallidum           | -0.053 | 0.679 | 0.906 |
| Divided attention mistakes | Left Hippocampus        | -0.077 | 0.544 | 0.892 |
| Divided attention mistakes | Left Amygdala           | 0.002  | 0.988 | 0.999 |
| Divided attention mistakes | Left Accumbens area     | -0.081 | 0.526 | 0.892 |
| Divided attention mistakes | Right Lateral Ventricle | -0.030 | 0.813 | 0.929 |
| Divided attention mistakes | Right Thalamus          | 0.206  | 0.102 | 0.544 |
| Divided attention mistakes | Right Caudate           | -0.154 | 0.224 | 0.596 |
| Divided attention mistakes | Right Putamen           | -0.216 | 0.087 | 0.544 |
| Divided attention mistakes | Right Pallidum          | -0.075 | 0.557 | 0.892 |
| Divided attention mistakes | Right Hippocampus       | 0.053  | 0.680 | 0.906 |
| Divided attention mistakes | Right Amygdala          | -0.000 | 0.999 | 0.999 |
| Divided attention mistakes | Right Accumbens area    | 0.040  | 0.754 | 0.928 |
| Divided attention missings | Left Lateral Ventricle  | -0.087 | 0.493 | 0.732 |
| Divided attention missings | Left Thalamus           | 0.104  | 0.415 | 0.732 |

|                            |                         |        |       |       |
|----------------------------|-------------------------|--------|-------|-------|
| Divided attention missings | Left Caudate            | -0.223 | 0.077 | 0.615 |
| Divided attention missings | Left Putamen            | -0.083 | 0.512 | 0.732 |
| Divided attention missings | Left Pallidum           | 0.095  | 0.457 | 0.732 |
| Divided attention missings | Left Hippocampus        | -0.139 | 0.274 | 0.732 |
| Divided attention missings | Left Amygdala           | -0.051 | 0.691 | 0.804 |
| Divided attention missings | Left Accumbens area     | -0.183 | 0.149 | 0.732 |
| Divided attention missings | Right Lateral Ventricle | -0.049 | 0.703 | 0.804 |
| Divided attention missings | Right Thalamus          | 0.128  | 0.314 | 0.732 |
| Divided attention missings | Right Caudate           | -0.230 | 0.067 | 0.615 |
| Divided attention missings | Right Putamen           | -0.139 | 0.273 | 0.732 |
| Divided attention missings | Right Pallidum          | 0.076  | 0.549 | 0.732 |
| Divided attention missings | Right Hippocampus       | 0.023  | 0.856 | 0.867 |
| Divided attention missings | Right Amygdala          | 0.021  | 0.867 | 0.867 |
| Divided attention missings | Right Accumbens area    | -0.117 | 0.356 | 0.732 |

**Supplementary Table S10.** Correlations of neuropsychological findings and subcortical volumes of patients with borderline personality disorder. Abbreviations: *CFT-20 R*, *Culture Fair Intelligence Test*; *IQ*, *intelligence quotient*; *MWT-B*, *Multiple-choice Word Test*; *TIV*, *total intracranial volume*; *VLMT*, *Verbal Learning and Memory Test*.



| Neuropsychological Test   | Brain Region             | r      | p-value | Adjusted<br>value | p-    |
|---------------------------|--------------------------|--------|---------|-------------------|-------|
| IQ CFT20R                 | GM/TIV corrected         | 0.113  | 0.390   |                   | 0.650 |
| IQ CFT20R                 | WM/TIV corrected         | -0.250 | 0.054   |                   | 0.268 |
| IQ CFT20R                 | CSF/TIV corrected        | 0.029  | 0.828   |                   | 0.828 |
| IQ CFT20R                 | TIV corrected            | 0.181  | 0.165   |                   | 0.413 |
| IQ CFT20R                 | Cerebellum/TIV corrected | -0.029 | 0.826   |                   | 0.828 |
| VLMT Learning             | GM/TIV corrected         | -0.076 | 0.537   |                   | 0.986 |
| VLMT Learning             | WM/TIV corrected         | -0.062 | 0.610   |                   | 0.986 |
| VLMT Learning             | CSF/TIV corrected        | 0.103  | 0.399   |                   | 0.986 |
| VLMT Learning             | TIV corrected            | 0.004  | 0.976   |                   | 0.986 |
| VLMT Learning             | Cerebellum/TIV corrected | 0.002  | 0.986   |                   | 0.986 |
| VLMT Recognition          | GM/TIV corrected         | 0.017  | 0.891   |                   | 0.891 |
| VLMT Recognition          | WM/TIV corrected         | 0.077  | 0.529   |                   | 0.891 |
| VLMT Recognition          | CSF/TIV corrected        | -0.092 | 0.452   |                   | 0.891 |
| VLMT Recognition          | TIV corrected            | -0.029 | 0.813   |                   | 0.891 |
| VLMT Recognition          | Cerebellum/TIV corrected | 0.053  | 0.667   |                   | 0.891 |
| VLMT Consolidation        | GM/TIV corrected         | -0.104 | 0.394   |                   | 0.657 |
| VLMT Consolidation        | WM/TIV corrected         | -0.113 | 0.354   |                   | 0.657 |
| VLMT Consolidation        | CSF/TIV corrected        | 0.165  | 0.175   |                   | 0.657 |
| VLMT Consolidation        | TIV corrected            | 0.052  | 0.669   |                   | 0.837 |
| VLMT Consolidation        | Cerebellum/TIV corrected | -0.002 | 0.987   |                   | 0.987 |
| Alertness no warning tone | GM/TIV corrected         | 0.026  | 0.838   |                   | 0.838 |
| Alertness no warning tone | WM/TIV corrected         | -0.099 | 0.436   |                   | 0.826 |
| Alertness no warning tone | CSF/TIV corrected        | 0.056  | 0.661   |                   | 0.826 |
| Alertness no warning tone | TIV corrected            | 0.063  | 0.620   |                   | 0.826 |
| Alertness no warning tone | Cerebellum/TIV corrected | -0.328 | 0.008   |                   | 0.041 |
| Alertness warning tone    | GM/TIV corrected         | 0.082  | 0.521   |                   | 0.758 |
| Alertness warning tone    | WM/TIV corrected         | -0.139 | 0.273   |                   | 0.683 |
| Alertness warning tone    | CSF/TIV corrected        | 0.027  | 0.832   |                   | 0.832 |

|                            |                          |        |       |       |
|----------------------------|--------------------------|--------|-------|-------|
| Alertness warning tone     | TIV corrected            | 0.066  | 0.606 | 0.758 |
| Alertness warning tone     | Cerebellum/TIV corrected | -0.298 | 0.017 | 0.084 |
| Phasic alertness           | GM/TIV corrected         | -0.138 | 0.275 | 0.688 |
| Phasic alertness           | WM/TIV corrected         | 0.057  | 0.654 | 0.817 |
| Phasic alertness           | CSF/TIV corrected        | 0.093  | 0.463 | 0.772 |
| Phasic alertness           | TIV corrected            | 0.013  | 0.918 | 0.918 |
| Phasic alertness           | Cerebellum/TIV corrected | -0.173 | 0.171 | 0.688 |
| Working memory mistakes    | GM/TIV corrected         | 0.018  | 0.890 | 0.988 |
| Working memory mistakes    | WM/TIV corrected         | -0.002 | 0.988 | 0.988 |
| Working memory mistakes    | CSF/TIV corrected        | 0.052  | 0.682 | 0.988 |
| Working memory mistakes    | TIV corrected            | 0.117  | 0.357 | 0.988 |
| Working memory mistakes    | Cerebellum/TIV corrected | 0.079  | 0.533 | 0.988 |
| Working memory missings    | GM/TIV corrected         | 0.027  | 0.830 | 0.830 |
| Working memory missings    | WM/TIV corrected         | 0.158  | 0.212 | 0.830 |
| Working memory missings    | CSF/TIV corrected        | -0.075 | 0.553 | 0.830 |
| Working memory missings    | TIV corrected            | 0.083  | 0.513 | 0.830 |
| Working memory missings    | Cerebellum/TIV corrected | -0.044 | 0.731 | 0.830 |
| Mental flexibility         | GM/TIV corrected         | -0.007 | 0.954 | 0.954 |
| Mental flexibility         | WM/TIV corrected         | 0.218  | 0.083 | 0.415 |
| Mental flexibility         | CSF/TIV corrected        | -0.095 | 0.457 | 0.712 |
| Mental flexibility         | TIV corrected            | 0.076  | 0.553 | 0.712 |
| Mental flexibility         | Cerebellum/TIV corrected | 0.072  | 0.570 | 0.712 |
| Divided attention mistakes | GM/TIV corrected         | 0.177  | 0.162 | 0.233 |
| Divided attention mistakes | WM/TIV corrected         | 0.167  | 0.186 | 0.233 |
| Divided attention mistakes | CSF/TIV corrected        | -0.236 | 0.060 | 0.233 |
| Divided attention mistakes | TIV corrected            | -0.092 | 0.470 | 0.470 |
| Divided attention mistakes | Cerebellum/TIV corrected | 0.170  | 0.180 | 0.233 |
| Divided attention missings | GM/TIV corrected         | 0.066  | 0.602 | 0.602 |
| Divided attention missings | WM/TIV corrected         | 0.171  | 0.178 | 0.297 |
| Divided attention missings | CSF/TIV corrected        | -0.097 | 0.446 | 0.557 |

|                            |                          |        |       |       |
|----------------------------|--------------------------|--------|-------|-------|
| Divided attention missings | TIV corrected            | -0.181 | 0.152 | 0.297 |
| Divided attention missings | Cerebellum/TIV corrected | 0.175  | 0.166 | 0.297 |

**Supplementary Table S11.** Correlations of neuropsychological findings and global volume measures of patients with borderline personality disorder. Abbreviations: *CFT-20 R*, *Culture Fair Intelligence Test*; *CSF*, *cerebrospinal fluid*; *GM*, *grey matter*; *IQ*, *intelligence quotient*; *MWT-B*, *Multiple-choice Word Test*; *TIV*, *total intracranial volume*; *VLMT*, *Verbal Learning and Memory Test*; *WM*, *white matter*.
